# Supplementary material for: The Genomic Landscape of TP53 and p53 Annotated High Grade Ovarian Serous Carcinomas from a Defined Founder Population Associated with Patient Outcome
Source: PLoS One. 2012 Sep 20;7(9):e45484. doi: 10.1371/journal.pone.0045484 (PMC3447752; doi:10.1371/journal.pone.0045484)
Supplement: Table S2 — Homozygous deletions affecting intragenic coding regions identified in TP53 mutation positive HGSC samples. Legend: HGSC, high-grade ovarian serous carcinoma; CHR, chromosome; CNV copy number variation. Blue font indicates genes identified as somatically mutated in TCGA, 2011. (XLS) [file pone.0045484.s002.xls]

## Sheet: Intragenic- Coding
Supplementary Table 2. Homozygous deletions affecting intragenic coding regions identified in TP53 mutation positive HGSC samples
CHR	Cytoband	Flanking SNP-start	Flanking SNP-end	Coordinates	Gene	Number of samples with deletion	Overlaps known CNV?	Overlaps global region of loss (TP53 mutation positive samples)?	% samples with focal loss of region (TP53 mutation positive samples)	Overlaps global region of loss (p53 immuno positive samples)?	% samples with focal loss of region (p53 immuno positive samples)	Overlaps global region of loss (p53 immuno negative samples)?	% samples with focal loss of region (p53 immuno negative samples)		Overlaps global region of loss identified by TCGA, 2011?	Overlaps focal region of loss identified by TCGA, 2011?	Overlaps global region of loss identified by Gorringe et al., 2010?	Overlaps focal region of loss identified by Gorringe et al., 2010?
1	1p32.2	rs4912187	rs3890764	chr1:58,541,545-61,734,541	OMA1,TACSTD2,MYSM1,JUN, LOC10013160,HSD52,FIGGY, HOOK1,CYP2J2,C1orf87,NFIA	1	CNV-large deletion		30		35		30			yes
1	1q24.2	rs16828170	rs3766084	chr1:167,495,768-167,505,182	NME7	11	CNV		20		20		25
2	2q13	rs922920	rs2018707	chr2:111,411,950-111,573,244	ACOXL	1	CNV-rare		25		15		30
2	2q37.1	rs1911592	rs250956	chr2:234,628,116-234,658,302	SPP2	1	CNV-rare		25		30		20
4	4q13.2	cnvi0021043	rs4860978	chr4:69,087,412-69,163,188	UGT2B17	9	CNV	yes	65	yes	75	yes	60		yes		yes
4	4q13.2	cnvi0023543	cnvi0017146	chr4:69,555,672-69,604,599	UGT2B15	1	CNV	yes	65	yes	75	yes	60		yes		yes
4	4q24	rs10000995	rs6855132	chr4:107,058,467-107,097,080	NPNT	1		yes	65	yes	75	yes	70		yes	yes	yes	yes
4	4q35.1	rs6855392	rs17073248	chr4:182,906,713-183,565,024	MGC45800, MIR1305, ODZ3	1	CNV-large deletion	yes	70	yes	80	yes	70		yes
5	5q21.3	rs7734092	rs1036214	chr5:108,323,379-108,492,133	FER	1	CNV-rare	yes	70	yes	75	yes	80		yes	yes		yes
5	5q35.3	cnvi0015423	rs6601158	chr5:180,309,991-180,329,822	BTNL8	12	CNV	yes	40	yes	45	yes	40		yes			yes
6	6p21.32	rs10080898	rs3101942	chr6:32,977,860-32,978,035	AK057104	1	CNV-rare		70		70		70
6	6q16.1	rs17447037	rs10806474	chr6:94,019,483-94,034,629	EPHA7	1		yes	50	yes	55		45		yes	yes		yes
6	6q26	rs6935149	rs2186815	chr6:162,687,672-162,806,676	PARK2	1	CNV	yes	65	yes	60		70		yes	yes		yes
7	7p12.3	rs17132198	rs17132208	chr7:48,286,444-48,288,946	ABCA13	1			25		30		20
7	7q36.2	rs6943853	rs4960626	chr7:154,197,342-154,283,541	DPP6	1	CNV-rare		30		30		35
8	8p23.2	rs6651443	rs11136866	chr8:391,493-521,421	FBXO25, C8orf42	1	CNV	yes	60	yes	60	yes	55		yes	yes	yes	yes
8	8p22.2	rs694565	rs10104818	chr8:2,877,299-4,471,906	CSMD1	4	CNV	yes	70	yes	70	yes	70		yes		yes	yes
8	8p23.1	rs7826486	rs2929470	chr8:9,093,118-9,099,900	BC017578	1	CNV	yes	70	yes	70	yes	70		yes		yes	yes
8	8p11.23	rs6998199	rs7462677	chr8:39,356,825-39,497,557	ADAM5P, ADAM3A	16	CNV	yes	75	yes	75	yes	70		yes		yes
8	8q22.3	rs2507768	rs1693547	chr8:101,625,913-101,783,570	ANKRD46, SNX31	1			35		40		30
9	9p24.1	rs490961	rs10511453	chr9:3,248,448-3,691,912	RFX3	1			55		45	yes	70		yes	yes		yes
9	9p21.1	rs12555727	rs7026407	chr9:32,446,656-32,492,525	DDX58	1	CNV-rare		50		50	yes	50		yes
9	9q21.33	rs12775504	rs7076964	chr9:89,585,632-89,589,556	CTSL3	1	CNV		40		40		45		yes			yes
9	9q31.3	rs2271878	rs16913836	chr9:110,908,706-110,911,686	C9orf5	1			40		40		45		yes			yes
9	9p24.3	rs12555266	rs279904	chr9:237,174-950,479	DOCK8, KANK1, DMRT1	1	CNV		50		40	yes	70		yes	yes
10	10q21.2	rs1046519	rs10733788	chr10:64,584,457-64,587,871	NRBF2	1			30		40		30
10	10q23.31	rs10887758	rs2248293	chr10:89,593,295-89,697,245	CFL1P1, KLLN, PTEN	1	CNV-rare		40		45		25					yes
11	11q11	rs596371	rs2102269	chr11:55,124,465-55,209,499	OR4C11,OR4P4,OR4S2,OR4C6	7	CNV		55		60		55					yes
12	12q13.11	rs180425	rs180427	chr12:45,459,330-45,460,583	SLC38A4	1	CNV-rare		30		30		25
12	12q24.31	rs895959	rs2230681	chr12:120,804,735-120,811,195	HPD, PSMD9	1	CNV-rare		45		45		40			yes
13	13q14.11	rs4555017	rs9594542	chr13:40,694,240-40,891,091	MTRF1 , NAA16	1	CNV-rare	yes	70	yes	70	yes	65		yes			yes
13	13q14.11	rs11616202	rs9525584	chr13:41,624,482-41,632,894	DGKH	1		yes	70	yes	75	yes	65		yes			yes
16	16p12.1	rs4787673	rs277899	chr16:24,960,612-25,079,775	LMCT1, LOC100506655	1	CNV		35		35		30		yes		yes
17	17q11.2	cnvi0008420	rs178870	chr17:26,545,913-26,807,370	NF1, OMG, EVI2B, EVI2A, RAB11FIP4	1	CNV	yes	90	yes	100	yes	90		yes	yes	yes	yes
17	17q21.2	cnvi0008462	cnvi0008464	chr17:36,465,641-36,474,192	LOC730755/KRTAP2-4	1	CNV-rare	yes	95	yes	100	yes	90		yes		yes	yes
17	17q24.2	rs7222649	rs4558468	chr17:63,666,271-63,681,642	CR595591	1	CNV-rare	yes	95	yes	100	yes	90		yes		yes
21	21q22.3	rs2154576	rs8127722	chr21:46,830,637-46,901,721	S100B, PRMT2	1	CNV-rare		55		55		55			yes
22	22q11.1	rs9606695	rs412830	chr22:16,214,898-16,429,681	CECR2, SCLC25A18	1	CNV-rare	yes	90	yes	80	yes	80		yes		yes	yes
22	22q11.21	rs5747492	rs5747494	chr22:17,006,637-17,009,028	TUBA8	1	CNV	yes	75	yes	70	yes	75		yes		yes	yes
22	22q12.1	rs2213645	rs132304	chr22:27,691,159-27,886,739	ZNRF3, C22orf31, KREMEN1	1	CNV-rare	yes	80	yes	80	yes	80		yes		yes	yes
X	Xp22.31	rs4830517	rs2108574	chrX:7,645,262-7,811,385	VCX	1	CNV		60	yes	60	yes	70					yes
X	Xp21.1	rs7888911	rs2182289	chrX:32,471,234-33,035,448	DMD	1	CNV		65	yes	65	yes	70					yes
X	Xq25	rs5958298	rs199431	chrX:122,734,607-122,938,922	XIAP, STAG2	1	CNV		75	yes	70	yes	70					yes
HGSC, high-grade serous carcinoma; CHR, chromosome; CNV copy number variation
Blue font indicates genes identified as somatically mutated in TCGA, 2011
