# Supplementary material for: The Genomic Landscape of TP53 and p53 Annotated High Grade Ovarian Serous Carcinomas from a Defined Founder Population Associated with Patient Outcome
Source: PLoS One. 2012 Sep 20;7(9):e45484. doi: 10.1371/journal.pone.0045484 (PMC3447752; doi:10.1371/journal.pone.0045484)
Supplement: Table S3 — Homozygous deletions affecting intragenic intronic regions identified in TP53 mutation positive HGSC samples. Legend: HGSC, high-grade ovarian serous carcinoma; CHR, chromosome; CNV copy number variation. Blue font indicates genes identified as somatically mutated in TCGA, 2011 (XLS) [file pone.0045484.s003.xls]

## Sheet: Intragenic- Intron
Supplementary Table 3. Homozygous deletions affecting intragenic intronic regions identified in TP53 mutation positive HGSC samples
CHR	Cytoband	Flanking SNP-start	Flanking SNP-end	Coordinates	Gene	Number of samples with deletion	Overlaps known CNV?	Overlaps global region of loss (TP53 mutation positive samples)?	% samples with focal loss of region (TP53 mutation positive samples)	Overlaps global region of loss (p53 immuno positive samples)?	% samples with focal loss of region (p53 immuno positive samples)	Overlaps global region of loss (p53 immuno negative samples)?	% samples with focal loss of region (p53 immuno negative samples)		Overlaps global region of loss identified by TCGA, 2011?	Overlaps focal region of loss identified by TCGA, 2011?	Overlaps global region of loss identified by Gorringe et al., 2010?	Overlaps focal region of loss identified by Gorringe et al., 2010?
1	1p22.3	rs7512039	cnvi0007359	chr1:86,174,832-86,176,913	COL24A1	3	CNV		30		40		30			yes
1	1q25.1	rs2156853	rs2156854	chr1:173,064,490-173,068,262	RABGAP1L	1	CNV		30		30		30
1	1q44	rs1538470	rs7523252	chr1:243,709,308-243,714,349	KIF26B	1	CNV		25		30		30
2	2p21	cnvi0009744	cnvi0009746	chr2:44,320,871-44,321,576	PPM1B	4	CNV		20		30		20
2	2q34	rs10164675	rs1505366	chr2:212,895,279-212,899,634	ERBB4	3	CNV		30		35		25
3	3p26.1	rs10433645	rs17045387	chr3:6,626,929-6,629,060	AF279782	8	CNV		45		50		35			yes		yes
3	3p26.1	rs7626393	rs1562688	chr3:8,470,425-8,475,321	LOC100288428	1			45		45		35			yes
3	3p22.2	rs7627496	rs9844203	chr3:37,954,886-37,961,253	CTDSPL	2	CNV		40		35		45
3	3p21.31	cnvi0011242	cnvi0019199	chr3:46,782,771-46,819,251	TESSP5	2	CNV		45		40		50
3	3q22.1	cnvi0011553	rs6773368	chr3:133,194,645-133,195,707	CPNE4	3	CNV		20		25		20
3	3q26.1	rs206280	rs206276	chr3:163,993,833-164,109,276	BC073807	8	CNV		30		35		30					yes
3	3q26.31	rs9833334	rs10490875	chr3:176,564,661-176,566,093	NAALADL2	1	CNV		35		35		40
3	3q28	rs6444540	rs297396	chr3:192,548,086-192,552,678	CCDC50	3	CNV		35		45		30
3	3q28	rs7612621	rs13326329	chr3:191,220,845-191,221,750	LEPREL1	15	CNV		35		45		30
4	4q25	rs10489128	rs34760772	chr4:108,285,187-108,288,489	dickkopf-2	1	CNV	yes	70	yes	75	yes	70		yes	yes	yes	yes
4	4q34.1	rs1394857	rs4557229	chr4:173,226,195-173,227,450	GALNTL6	11	CNV	yes	75	yes	75	yes	75		yes		yes
5	5q11.2	rs4409049	rs7735398	chr5:59,628,702-59,638,394	PDE4D	1		yes	70	yes	70	yes	75		yes			yes
5	5q11.2	cnvi0012777	cnvi0012779	chr5:58,765,648-58,765,868	PDE4D	1		yes	65	yes	65	yes	70		yes			yes
5	5q33.1	rs29824	rs256157	chr5:151,495,149-151,499,003	AK001582	10	CNV	yes	50	yes	50	yes	45		yes			yes
6	6p21.33	rs2517817	rs9259830	chr6:29,967,496-30,003,090	HLA-A/AK09625	3	CNV		40		40		45
6	6p21.33	rs9378229	rs4562185	chr6:31,388,175-31,396,472	HLA-B	1	CNV		40		35		45
6	6q12	rs9362651	rs6940639	chr6:65,029,395-65,033,854	EYS	1	CNV-rare	yes	40	yes	45		45		yes
6	6q24.1	rs11486668	rs7752068	chr6:139,645,437-139,648,424	TXLNB	3	CNV	yes	60	yes	60		60		yes			yes
7	7p22.2	rs12539805	rs10238338	chr7:3,577,441-3,584,669	SDK1	1	CNV		45		45		55			yes
7	7q21.3	rs35833980	rs10243929	chr7:93,166,405-93,168,493	GNG1	4	CNV		20		30		30
7	7q34	rs4329195	rs4726489	chr7:141,419,097-141,439,888	MGAM	6	CNV		15		20		25					yes
8	8p23.3	rs1703882	rs6559040	chr8:584,761-588,391	ERICH1	49	CNV	yes	60	yes	60	yes	60		yes		yes	yes
8	8q23.3	rs1451881	rs717406	chr8:1,070,543-1,073,568	BC022082	1			60		60		60					yes
8	8p21.2	rs7822487	cnvi0017712	chr8:25,468,655-25,470,302	PPP2R2A	1	CNV	yes	60	yes	60	yes	60		yes	yes	yes	yes
8	8q11.2	rs203618	rs203617	chr8:51,195,366-51,196,070	SNTG1	1	CNV		40		50		45
8	8q13.3	rs4737315	rs10104393	chr8:72,378,670-72,380,244	EYA1	6	CNV		20		20		20					yes
9	9p21.3	rs12006514	rs734477	chr9:20,577,397-20,594,461	MLLT3	1	CNV-rare		50		45	yes	65		yes
9	9q22.31	rs1492682	rs1492680	chr9:93,435,880-93,439,065	ROR2	1	CNV		40		45		45		yes			yes
9	9q31.1	rs4149302	rs4149300	chr9:106,636,026-106,636,232	ABCA1	1	CNV		45		55		45		yes			yes
9	9q32	rs2676624	rs10981455	chr9:114,398,870-114,406,976	KIAA1958	1	CNV		50		55		45		yes			yes
10	10q21.1	rs12263153	rs11001385	chr10:53,686,068-53,686,625	PRKG1	6	CNV		30		40		20
11	11q24.2	rs546427	rs12285344	chr11:85,983,406-85,984,049	ME3	1	CNV		40		45		40
12	12p13.33	rs12579529	rs12321253	chr12:2,115,897-2,117,588	CACNA1C	1	CNV		15		20		15
12	12q15	rs10879145	rs4105088	chr12:69,160,993-69,162,893	BC031864	5	CNV		40		45		40
12	12q22	cnvi0005767	cnvi0005769	chr12:94,112,887-94,113,440	FGD6	1	CNV-rare		30		40		30			yes
12	12q24.23	rs11064831	rs708893	chr12:118,473,336-118,475,695	AF086288	1	CNV		40		45		45			yes
13	13q13.2	cnvi0006685	rs9285097	chr13:33,039,695-33,041,447	STARD13	5	CNV	yes	65	yes	70	yes	60		yes			yes
14	14q21.3	rs6572412	rs7157343	chr14:46,744,261-46,747,936	MDGA2	1	CNV-rare		50	yes	50		45
15	15q11.2	rs1557873	rs11855196	chr15:23,139,455-23,150,130	UBE3A	1	CNV-rare		40	yes	45		40		yes	yes
15	15q13.3	rs4072398	rs4779984	chr15:30,297,802-30,302,218	DKFZp434L187	1	CNV		40	yes	50		40		yes	yes
15	15q22.2	rs2899666	rs2011857	chr15:59,142,548-59,155,919	RORA	1			45	yes	55		45		yes
16	16p13.12	rs169773	rs6498319	chr16:12,532,672-12,555,486	SNX29	1	CNV		40		40		40		yes		yes
18	18p11.23	rs16952487	rs607396	chr18:7,724,756-7,745,226	PTPRM	1			30		30		35		yes
18	18q21.1	rs7231689	rs650329	chr18:42,532,983-42,533,890	ST8SIA5	1			35	yes	30	yes	35		yes			yes
21	21q21.1	cnvi0010707	cnvi0010708	chr21:18,249,338-18,250,201	CHODL	9	CNV		50		45		55			yes		yes
21	21q21.1	rs1573443	rs2103500	chr21:19,046,840-19,329,426	PPIAL3	1	CNV-rare		45		50		55			yes		yes
22	22q11.23	rs9612240	cnvi0010915	chr22:21,808,695-21,808,695	RTDR1	6	CNV	yes	80	yes	80	yes	75		yes		yes	yes
22	22q13.2	rs4988386	rs742134	chr22:41,844,830-41,848,219	BIK	1	CNV-rare	yes	85	yes	90	yes	70		yes		yes	yes
X	Xp21.1	rs11796464	rs5928107	chrX:32,816,970-32,830,463	DMD	1	CNV	yes	65	yes	65		70					yes
X	Xq21.1	cnvi0003289	cnvi0021311	chrX:76,891,087-76,905,013	ATRX	1			65	yes	70		55					yes
HGSC, high-grade serous carcinoma; CHR, chromosome; CNV copy number variation
Blue font indicates genes identified as somatically mutated in TCGA, 2011
