# Supplementary material for: The Genomic Landscape of TP53 and p53 Annotated High Grade Ovarian Serous Carcinomas from a Defined Founder Population Associated with Patient Outcome
Source: PLoS One. 2012 Sep 20;7(9):e45484. doi: 10.1371/journal.pone.0045484 (PMC3447752; doi:10.1371/journal.pone.0045484)
Supplement: Table S5 — Amplicons identified in TP53 mutation positive HGSC samples, containing genes. Legend: HGSC, high-grade ovarian serous carcinoma; CHR, chromosome; CNV copy number variation. (XLS) [file pone.0045484.s005.xls]

## Sheet: Amplicons-containing genes
Supplementary Table 5. Amplicons identified in TP53 mutation positive HGSC samples, containing genes
CHR	Cytoband	Flanking SNP-start	Flanking SNP-end	Coordinates	Number of genes mapping to amplicon	Number of samples with amplification	Overlaps known CNV?	Overlaps global region of gain (TP53 mutation positive samples)?	% samples with focal gain of region (TP53 mutation positive samples)	Overlaps global region of loss (p53 immuno positive samples)?	% samples with focal gain of region (p53 immuno positive samples)	Overlaps global region of loss (p53 immuno negative samples)?	% samples with focal gain of region (p53 immuno negative samples)		Overlaps global region of gain identified by TCGA, 2011?	Overlaps focal region of gain identified by TCGA, 2011?	Overlaps global region of gain identified by Gorringe et al., 2010?	Overlaps focal region of gain identified by Gorringe et al., 2010?	Genes specifically amplified within region in at least one sample
1	1p36.12	rs1780321	rs1557087	chr1:21696695-21831602	2	2	CNV		20		20		20						ALPL, RAP1GAP
1	1p35.1-1p34.2	rs12730560	rs11209799	chr1:33008238-41528143	46	2	CNV		25		25		30			yes		yes	KIAA1522, YARS, S100PBP, FNDC5, HPCA, TMEM54, RNF19B, AK2, ADC, OSCP1, MRPS15, CSF3R, GRIK3, MIR4255, LOC728431, ZC3H12A, MEAF6, SNIP1, DNALI1, GNL2, RSPO1,BMP8A, PPIEL, PABPC4, SNORA55, HEYL, NT5C1A, HPCAL4, PPIE, BMP8B, OXCT2, TRIT1, MYCL1, MFSD2A, CAP1, PPT1, RLF,RIMS3, LOC100130557, NFYC, MIR30E, MIR30C1, KCNQ4, CITED4, CTPS, LOC100507178, SLFNL1, SCMH1
1	1p34.2-1p34.1	rs12025180	rs11576516	chr1:42712897-44429016	21	1	CNV		25		25		25						CCDC30, PPIH, YBX1, CLDN19, LEPRE1, C1orf50, LOC100129924, CCDC23, ERMAP, ZNF691, SLC2A1, FLJ32224, ST3GAL3, ARTN, IPO13, DPH2, ATP6V0B, B4GALT2, CCDC24, SLC6A9, KLF17
1	1p33-1p32.3	rs3766195	rs11206172	chr1:47057159-53791071	46	2	CNV		20		20		15						CYP4B1, CYP4Z2P, CYP4A11, CYP4X1, CYP4Z1, CYP4A22, PDZK1IP1, TAL1, STIL, CMPK1, FOXE3, MGC12982, FOXD2, LOC388630, SKINTL, SLC5A9, SPATA6, AGBL4, BEND5, ELAVL4, DMRTA2, FAF1, CDKN2C, C1orf185, RNF11, TTC39A, EPS15, OSBPL9, NRD1, MIR761, RAB3B, TXNDC12, KTI12, BTF3L4, ZFYVE9, SCP2, PODN, SLC1A7, CPT2, C1orf123, MAGOH, LOC100507564, LRP8, FLJ40434, DMRTB1, GLIS1
1	1p31.3	rs11207811	rs12117302	chr1:61937800-62289893	2	1	CNV		15		15		5						TM2D1, INADL
1	1p31.1	rs7514956	rs1834189	chr1:73792284-74885645	5	1			10		10		5						LRRIQ3, FPGT-TNNI3K, FPGT, TNNI3K, C1orf173
1	1p13.3	rs536934	rs17645031	chr1:109447783-109636461	5	1	CNV		15		25		15						C1orf194, KIAA1324, SARS, CELSR2, PSRC1
1	1p13.2-1p12	rs6664266	rs10923556	chr1:114620517-118704719	22	1	CNV		20		25		20						TRIM33, BCAS2, DENND2C, AMPD1, NRAS, CSDE1, SIKE1, SYCP1, TSHB, TSPAN2, NGF, VANGL1, CASQ2, NHLH2, CD58, IGSF3, MIR320B1, CD2, PTGFRN, GDAP2, WDR3, SPAG17
1	1q21.1	rs10910845	rs6666013	chr1:144434477-146202411	17	2	CNV		25	yes	30		20					yes	PDZK1, GPR89A, GPR89C, PDZK1P1, NBPF11, NBPF24, LOC728989, PRKAB2, PDIA3P, FMO5, CHD1L, LOC100289211, BCL9, ACP6, GJA5, GJA8, GPR89B
1	1q21.2-1q23.1	rs685644	rs2151157	chr1:147844664-155604287	111	4	CNV		35	yes	45		20			yes		yes	LOC728855, HIST2H2BF, FCGR1A, HIST2H3D, HIST2H4A, HIST2H4B, HIST2H3C, HIST2H3A, HIST2H2AA4, HIST2H2AA3, HIST2H2BC, HIST2H2BE, HIST2H2AC, HIST2H2AB, BOLA1, SV2A, SF3B4, MTMR11, OTUD7B, VPS45, PLEKHO1, ANP32E, CA14, APH1A, C1orf54, C1orf51, MRPS21, PRPF3, RPRD2, TARS2, ECM1, ADAMTSL4, MIR4257, MCL1, ENSA, GOLPH3L, HORMAD1, CTSS, CTSK, ARNT, SETDB1, CERS2, ANXA9, FAM63A, PRUNE, BNIPL, C1orf56, CDC42…
1	1q23.3	rs4656940	rs10799880	chr1:159096892-161141595	50	1	CNV		35	yes	45		15					yes	CD244, ITLN1, ITLN2, F11R, TSTD1, USF1, ARHGAP30, PVRL4, KLHDC9, PFDN2, NIT1, DEDD, UFC1, USP21, PPOX, B4GALT3, ADAMTS4, NDUFS2, FCER1G, APOA2, TOMM40L, NR1I3, PCP4L1, MPZ, SDHC, C1orf192, FCGR2A, HSPA6, FCGR3A, FCGR2C, HSPA7, FCGR3B, FCGR2B, RPL31P11, FCRLA, FCRLB, DUSP12, ATF6, OLFML2B, NOS1AP, MIR4654, MIR556, C1orf111, C1orf226, SH2D1B, UHMK1, UAP1, DDR2, HSD17B7, C1orf110
1	1q23.3	rs1934533	rs11808475	chr1:161810065-163079277	2	1			30	yes	40		15					yes	PBX1, LOC100505795
1	1q31.1-1q31.3	rs2430080	rs1033928	chr1:186050561-194430520	11	2	CNV		20	yes	30		15					yes	FAM5C, RGS21, RGS1, RGS13, RGS2, UCHL5, TROVE2, GLRX2, CDC73, MIR1278, B3GALT2
1	1q32.1	rs2275869	rs823156	chr1:203541229-204031263	13	1			30	yes	40		30					yes	NUAK2, KLHDC8A, LOC284576, LEMD1, MIR135B, CDK18, LOC284578, MFSD4, ELK4, SLC45A3, NUCKS1, RAB7L1, SLC41A1
1	1q41-1q43	rs17163777	rs9661714	chr1:221535355-238714517	131	6	CNV		35	yes	35		25			yes		yes	SUSD4, C1orf65, CAPN8, CAPN2, TP53BP2, FBXO28, DEGS1, NVL, MIR320B2, CNIH4, WDR26, MIR4742, CNIH3, DNAH14, LBR, ENAH, SRP9, EPHX1, TMEM63A, LEFTY1, PYCR2, LEFTY2, C1orf55, H3F3A, H3F3AP4, ACBD3, MIXL1, LIN9, PARP1, C1orf95, ITPKB, PSEN2, ADCK3, CDC42BPA, ZNF678, ZNF847P, LOC100130093, JMJD4, SNAP47, PRSS38, WNT9A, WNT3A, ARF1, MIR3620, C1orf35, MRPL55, GUK1, GJC2, IBA57, OBSCN, TRIM11, TRIM17, HI…
1	1q43-1q44	rs12132796	rs2365966	chr1:240528827-242941460	12	2	CNV		30	yes	40		30			yes		yes	PLD5, LOC731275, CEP170, SDCCAG8, MIR4677, AKT3, LOC339529, ZNF238, C1orf100, ADSS, C1orf101, PPPDE1
2	2p25.3	rs13430369	rs6745451	chr2:1477521-1755768	2	1	CNV		40		40		40					yes	TPO, PXDN
2	2p23.2-2p23.1	rs2175095	rs10495775	chr2:28440573-30468387	3	1	CNV		30		30		30			yes		yes	FOSL2, PLB1, LBH
2	2p21	rs4148182	rs7560946	chr2:43910094-43974350	3	1	CNV		20		25		15			yes		yes	ABCG5, ABCG8, LRPPRC
2	2p21	rs6739975	rs4422207	chr2:47095844-47417538	3	1	CNV		20		20		15					yes	TTC7A, C2orf61, CALM2
2	2p16.1-2p15	rs13006409	rs4671408	chr2:60768152-61742206	12	1	CNV		15		15		15					yes	PAPOLG, FLJ16341, REL, PUS10, PEX13, KIAA1841, LOC339803, C2orf74, AHSA2, USP34, SNORA70B, XPO1
2	2p13.3	rs17664519	rs12476972	chr2:71056057-71339758	7	2	CNV		15		15		15					yes	ANKRD53, TEX261, OR7E91P, NAGK, MCEE, MPHOSPH10, PAIP2B
2	2q11.2	rs2971015	rs1192827	chr2:100590416-101190978	3	1	CNV		15		20		10						NPAS2, RPL31, TBC1D8
2	2q13-2q14.1	rs3791334	rs11902588	chr2:113658240-114686122	15	1	CNV		15		15		10			yes		yes	PSD4, PAX8, LOC654433, CBWD2, FOXD4L1, FAM138B, WASH2P, DDX11L2, RPL23AP7, RABL2A, SLC35F5, MIR4782, ACTR3, LOC100499194, LOC440900
2	2q22.1-2q22.2	rs4954968	rs1470488	chr2:139361262-142752241	2	1			15		10		20						LOC647012, LRP1B
2	2q22.3-2q23.1	rs17789657	rs7579197	chr2:146600363-149568909	6	2	CNV		15		10		30						PABPC1P2, ACVR2A, ORC4, MBD5, EPC2, KIF5C
2	2q24.1	rs2444770	rs1357182	chr2:158211985-158740491	4	1			20		15		20						ACVR1, UPP2, LOC554201, CCDC148
2	2q33.2-2q33.3	rs13430972	rs11674656	chr2:203943721-207869974	25	1	CNV		15		15		20						ABI2, RAPH1, CD28, CTLA4, ICOS, PARD3B, NRP2, INO80D, LOC100329109, NDUFS1, EEF1B2, SNORD51, SNORA41, GPR1, ZDBF2, ADAM23, LOC200726, DYTN, MDH1B, FASTKD2, MIR3130-2, MIR3130-1, CPO, KLF7, MIR2355
2	2q33.3-2q34	rs3769521	rs4261669	chr2:208824998-209431457	3	1			15		15		20						IDH1, PIKFYVE, PTH2R
2	2q37.2-2q37.3	rs1427696	rs10166334	chr2:235400669-237405247	6	1	CNV		15		15		20						SH3BP4, AGAP1, GBX2, ASB18, IQCA1, CXCR7
2	2q37.3	rs13034207	rs7600379	chr2:240206200-240357700	1	2	CNV		15		15		15						LOC150935
3	3p26.3-3p25.1	cnvi0028361	rs11708596	chr3:70545-14664397	72	3	CNV		10		15		10						CHL1, CNTN6, CNTN4, IL5RA, TRNT1, CRBN, SETMAR, SUMF1, ITPR1, EGOT, LOC100507582, BHLHE40, ARL8B, EDEM1, MIR4790, CAV3, OXTR, RAD18, THUMPD3, LOC440944, SETD5, LHFPL4, MTMR14, CPNE9, BRPF1, OGG1, CAMK1, TADA3, ARPC4, ARPC4-TTLL3, TTLL3, RPUSD3, CIDEC, JAGN1, IL17RE, CRELD1, PRRT3, TMEM111, LOC401052, CIDECP, FANCD2, C3orf24, BRK1, VHL, IRAK2, TATDN2, GHRLOS2, GHRL, GHRLOS, SEC13, ATP2B2, MIR885, …
3	3p12.3	rs6548429	rs11127627	chr3:76559700-78702929	1	1	CNV		15		15		15						ROBO2
3	3q13.2	rs6796382	rs4682420	chr3:113358612-113923382	6	1	CNV	yes	20	yes	25	yes	15		yes		yes	yes	SLC9A10, CD200, BTLA, ATG3, SLC35A5, CCDC80
3	3q13.31-3q21.2	rs867666	rs10512647	chr3:116036473-126537059	34	3	CNV	yes	25	yes	25	yes	20		yes		yes	yes	ZBTB20, GAP43, LSAMP, LSAMP-AS3, IGSF11, C3orf30, UPK1B, B4GALT4, ARHGAP31, TMEM39A, POGLUT1, TIMMDC1, CD80, ADPRH, PLA1A, POPDC2, COX17, C3orf15, NR1I2, GSK3B, GPR156, LRRC58, SEMA5B, PDIA5, MYLK, CCDC14, ROPN1, KALRN, UMPS, ITGB5, MUC13, HEG1, SLC12A8, ZNF148
3	3q21.2-3q21.3	rs16836866	rs9828443	chr3:126768905-128904176	12	4	CNV	yes	30	yes	35	yes	20		yes		yes	yes	OSBPL11, MIR548I1, LOC100125556, ALG1L, ROPN1B, SLC41A3, ALDH1L1, TPRA1, MCM2, PODXL2, ABTB1, MGLL
3	3q24	rs10513205	rs9289757	chr3:144682819-148849126	9	2	CNV	yes	45	yes	45	yes	45		yes		yes	yes	SLC9A9, C3orf58, PLOD2, PLSCR4, PLSCR2, PLSCR1, PLSCR5, ZIC4, ZIC1
3	3q24-3q25.1	rs1403428	rs2035741	chr3:149752754-151082516	6	1	CNV	yes	45	yes	45	yes	50		yes		yes	yes	AGTR1, WWTR1, WWTR1-AS1, COMMD2, ANKUB1, RNF13
3	3q25.1-3q25.2	rs1491975	rs7620094	chr3:152665887-155807740	15	2	CNV	yes	45	yes	45	yes	50		yes		yes	yes	MIR548H2, AADACL2, LOC201651, AADAC, SUCNR1, LOC401093, MBNL1, TMEM14E, P2RY1, RAP2B, C3orf79, ARHGEF26-AS1, ARHGEF26, DHX36, GPR149
3	3q26.1-3q26.32	rs4680582	rs9917710	chr3:161617980-177762913	55	10	CNV	yes	50	yes	45	yes	45		yes	yes	yes	yes	SMC4, TRIM59, KPNA4, SCARNA7, ARL14, PPM1L, B3GALNT1, NMD3, SPTSSB, OTOL1, LOC647107, SI, SLITRK3, BCHE, ZBBX, SERPINI2, WDR49, PDCD10, SERPINI1, LOC646168, GOLIM4, EGFEM1P, MIR551B, MECOM, TERC, ARPM1, MYNN, LRRC34, LRRIQ4, LRRC31, SAMD7, LOC100128164, SEC62, GPR160, PHC3, PRKCI, SKIL, CLDN11, SLC7A14, RPL22L1, EIF5A2, SLC2A2, TNIK, MIR569, PLD1, TMEM212, FNDC3B, GHSR, TNFSF10, NCEH1, ECT2, SPAT…
3	3q26.32	rs2862632	rs17635597	chr3:178007464-178904149	1	1	CNV	yes	55	yes	55	yes	55		yes		yes	yes	TBL1XR1
3	3q26.33-3q27.3	rs2687799	rs9879899	chr3:183939763-187864410	55	1	CNV	yes	45	yes	40	yes	55		yes		yes	yes	ATP11B, DCUN1D1, MCCC1, LAMP3, MCF2L2, B3GNT5, LOC100505687, KLHL6, KLHL24, YEATS2, MAP6D1, PARL, ABCC5, HTR3D, HTR3C, HTR3E, EIF2B5, DVL3, AP2M1, ABCF3, VWA5B2, MIR1224, ALG3, ECE2, CAMK2N2, PSMD2, EIF4G1, SNORD66, FAM131A, CLCN2, POLR2H, THPO, CHRD, EPHB3, MAGEF1, VPS8, C3orf70, LOC339926, EHHADH, MAP3K13, TMEM41A, LIPH, SENP2, IGF2BP2, C3orf65, TRA2B, LOC344887, ETV5, DGKG, LOC253573, CRYGS, T…
3	3q28	rs7626795	rs1510900	chr3:191833155-192252399	3	1	CNV	yes	45	yes	35	yes	55		yes		yes	yes	IL1RAP, GMNC, SNAR-I
3	3q28-3q29	rs4602335	rs6444670	chr3:193553281-194082030	2	1	CNV	yes	45	yes	30	yes	55		yes	yes	yes	yes	FGF12, MB21D2
4	4p16.3-4p16.1	rs6599348	rs10938692	chr4:460103-8169461	12	1	CNV		15		5		25					yes	ZNF721, PIGG, PDE6B, ATP5I, MYL5, MFSD7, PCGF3, C4orf42, MAEA, KIAA1530, CRIPAK, ABLIM2
4	4p15.1-4p13	rs10005330	rs1460608	chr4:30948529-43548268	28	1	CNV		5		5		5						KIAA1239, C4orf19, TBC1D1, PTTG2, TLR10, TLR1, TLR6, FAM114A1, MIR574, TMEM156, KLHL5, WDR19, RFC1, KLB, RPL9, LIAS, LOC401127, UGDH, C4orf34, UBE2K, PDS5A, LOC344967, N4BP2, RHOH, CHRNA9, APBB2, UCHL1, LIMCH1
4	4q12	rs9784552	rs7667406	chr4:54164251-57197834	6	1	CNV		5		5		10						KIAA1211, AASDH, PPAT, PAICS, SRP72, ARL9
4	4q21.23-4q21.3	rs12504294	rs4386565	chr4:86768618-87973490	5	1	CNV		5		5		2						ARHGAP24, MIR4451, MAPK10, PTPN13, SLC10A6
4	4q28.3-4q31.21	cnvi0013961	rs1532013	chr4:137288029-141875917	8	2	CNV		5		2		10						LOC641365, LOC641364, SLC7A11, SETD7, MGST2, MAML3, UCP1, TBC1D9
5	5p15.33	rs10040987	rs12515754	chr5:869095-3398843	22	3	CNV		45		35		50			yes		yes	ZDHHC11, BRD9, TRIP13, LOC100506688, NKD2, SLC12A7, MIR4635, SLC6A19, SLC6A18, TERT, MIR4457, CLPTM1L, SLC6A3, LPCAT1, SDHAP3, LOC728613, MIR4277, MRPL36, NDUFS6, IRX4, IRX2, C5orf38
5	5p15.32-5p15.2	rs12386494	rs2388004	chr5:5998310-9049618	5	2	CNV		35		25		30					yes	MIR4454, LOC442132, LOC729506, LOC100505738, MIR4458
5	5p15.2-5p14.1	rs6876343	rs10942181	chr5:12023847-26637888	20	4	CNV		25		25		25					yes	DNAH5, TRIO, FAM105A, FAM105B, ANKH, MIR4637, FBXL7, MARCH11, ZNF622, FAM134B, MYO10, LOC285696, BASP1, LOC401177, CDH18, GUSBP1, CDH12, PMCHL1, PRDM9, CDH10
5	5p14.1	rs1505054	rs1119686	chr5:26787999-26955104	1	1	CNV		30		30		20					yes	CDH9
5	5p11	rs10069793	rs13179713	chr5:45838908-49955095	1	2	CNV		30		20		20					yes	EMB
5	5q15-5q21.1	rs392632	rs10464032	chr5:93979772-98479500	16	1	CNV		5		5		5						KIAA0825, ANKRD32, MCTP1, ELL2, MIR583, PCSK1, CAST, ERAP1, ERAP2, LNPEP, LIX1, RIOK2, RGMB, FLJ35946, CHD1, LOC100289230
6	6p24.3	rs17340275	rs603392	chr6:7915209-8111629	6	1			30		30		25					yes	MUTED-TXNDC5, PIP5K1P1, MUTED, EEF1E1-MUTED, EEF1E1, SCARNA27
6	6p24.1-p22.3	rs1937774	rs7738608	chr6:13208807-16492644	16	1	CNV		25		30		25					yes	PHACTR1, LOC100130357, TBC1D7, GFOD1, SIRT5, NOL7, RANBP9, CCDC90A, RNF182, CD83, JARID2, DTNBP1, MYLIP, MIR4639, GMPR, ATXN1
6	6p22.3-6p22.2	rs2744057	rs550969	chr6:18081947-24054846	12	4	CNV		30		30		25			yes		yes	KIF13A, NHLRC1, TPMT, KDM1B, RNF144B, MIR548A1, CDKAL1, SOX4, LINC00340, LOC729177, PRL, HDGFL1
6	6p22.1	rs9461362	rs2394002	chr6:27411906-27855994	5	1	CNV		30		25		30					yes	ZNF204P, ZNF391, ZNF184, LOC100507173, LOC100131289
6	6p21.32	rs9268880	rs35085841	chr6:32539336-32597079	1	2	CNV		30		30		35					yes	HLA-DRB5
6	6p21.31-6p21.1	rs4711369	rs2477831	chr6:34006847-41551667	52	3	CNV		25		30		25					yes	MIR1275, GRM4, HMGA1, C6orf1, FKBP5, LOC285847, ARMC12, C6orf126, C6orf127, CLPS, LHFPL5, SRPK1, SLC26A8, MAPK14, PIM1, TMEM217, TBC1D22B, RNF8, FTSJD2, CCDC167, MIR4462, MDGA1, ZFAND3, BTBD9, GLO1, DNAH8, LOC100131047, GLP1R, SAYSD1, KCNK5, KCNK17, KCNK16, KIF6, DAAM2, MOCS1, FLJ41649, TDRG1, LRFN2, UNC5CL, TSPO2, APOBEC2, C6orf130, NFYA, LOC221442, TREML1, TREM2, TREML2, TREML3, TREML4, TREML2P…
6	6p21.1	rs181990	rs2295154	chr6:42454334-42741634	2	1			25		30		30			yes		yes	TRERF1, UBR2
6	6q11.1	cnvi0000343	rs9344902	chr6:61942912-62512312	1	1	CNV		40		25		70						KHDRBS2
6	6q16.2-6q21	rs9493634	rs352834	chr6:99731315-109630514	39	2	CNV		5		5		5			yes			C6orf168, COQ3, PNISR, USP45, LOC100130890, CCNC, PRDM13, MCHR2, LOC728012, SIM1, ASCC3, GRIK2, HACE1, LIN28B, BVES, C6orf112, POPDC3, PREP, PRDM1, ATG5, AIM1, RTN4IP1, QRSL1, LOC100422737, C6orf203, BEND3, PDSS2, SOBP, SCML4, SEC63, OSTM1, NR2E1, SNX3, LACE1, FOXO3, LINC00222, ARMC2, SESN1, CEP57L1
6	6q25.1	rs851998	rs9322336	chr6:152025031-152242123	1	1	CNV		5		2		10						ESR1
7	7p15.3-7p15.1	rs2158250	rs1637457	chr7:20391971-28615963	64	1	CNV		10		15		15					yes	ITGB8, ABCB5, SP8, RPL23P8, SP4, DNAH11, CDCA7L, RAPGEF5, STEAP1B, LOC100506178, IL6, TOMM7, SNORD93, FAM126A, KLHL7, NUPL2, GPNMB, C7orf30, IGF2BP3, RPS2P32, TRA2A, CLK2P, CCDC126, C7orf46, STK31, NPY, MPP6, DFNA5, OSBPL3, CYCS, C7orf31, NPVF, MIR148A, NFE2L3, HNRNPA2B1, CBX3, SNX10, LOC441204, KIAA0087, C7orf71, SKAP2, HOXA1, HOTAIRM1, HOXA2, HOXA3, HOXA4, LOC100133311, HOXA5, HOXA6, HOXA7, HOX…
7	7p14.3-7p14.1	rs978821	rs7789925	chr7:31888667-39231954	28	1	CNV		15		20		20						PDE1C, LOC100130673, LSM5, AVL9, FKBP9, NT5C3, RP9, BBS9, BMPER, AAA1, NPSR1, , EEPD1, KIAA0895, ANLN, AOAH, ELMO1, MIR1200, TXNDC3, SFRP4, EPDR1, STARD3NL, TARP, LOC100506776, AMPH, FAM183B, VPS41, POU6F2
7	7p14.1	rs2049622	rs2330442	chr7:42142807-42346596	1	1			20		20		30						GLI3
7	7p12.1	rs10274003	rs10156067	chr7:50901172-51126106	1	1			15		20		15						COBL
7	7q11.23	rs12669267	rs11557831	chr7:72942572-73247092	4	1			20	yes	15	yes	30						ELN, LIMK1, EIF4H, MIR590
7	7q21.3	rs1989968	rs3816943	chr7:95887434-97691120	14	2	CNV		20	yes	25	yes	30					yes	FLJ42280, LOC100506136, SHFM1, DLX6-AS1, DLX6, DLX5, ACN9, TAC1, ASNS, MGC72080, OCM2, LMTK2, BHLHA15, TECPR1
7	7q22.1	rs144173	rs3757460	chr7:100254186-100668360	18	2	CNV		30	yes	40	yes	30					yes	EPHB4, SLC12A9, TRIP6, SRRT, UFSP1, ACHE, MUC12, MUC17, TRIM56, SERPINE1, AP1S1, MIR4653, VGF, NAT16, MOGAT3, PLOD3, ZNHIT1, CLDN15
7	7q31.1-7q31.2	rs6942986	rs6955690	chr7:113369205-115003497	3	1			30	yes	25	yes	30					yes	FOXP2, MIR3666, MDFIC
7	7q32.1-7q32.2	rs4731437	rs6942490	chr7:127699802-129032029	10	1	CNV		25	yes	35	yes	30					yes	RBM28, PRRT4, IMPDH1, HILPDA, METTL2B, TSPAN33, SMO, AHCYL2, FAM40B, LOC100287482
7	7q33	rs11766224	rs706557	chr7:135423208-136577354	3	2	CNV		35	yes	40	yes	35					yes	CHRM2, MIR490, PTN
7	7q35	rs6962216	rs11769191	chr7:144488779-147219701	3	1	CNV		35	yes	35	yes	40			yes		yes	CNTNAP2, MIR548I4, MIR548F4
8	8p12-8q11.1	rs3843018	rs13279994	chr8:37337810-47653281	45	9	CNV		20		20		20			yes		yes	ZNF703, ERLIN2, LOC728024, PROSC, GPR124, BRF2, RAB11FIP1, GOT1L1, ADRB3, EIF4EBP1, ASH2L, STAR, LSM1, BAG4, DDHD2, PPAPDC1B, WHSC1L1, LETM2, FGFR1, C8orf86, RNF5P1, TACC1, PLEKHA2, HTRA4, TM2D2, ADAM9, ADAM32, ADAM5P, ADAM3A, ADAM18, ADAM2, IDO1, IDO2, C8orf4, ZMAT4, SFRP1, GOLGA7, GINS4, AGPAT6, NKX6-3, ANK1, MIR486, KAT6A, AP3M2, PLAT
8	8q11.22-8q12.1	rs16914321	rs16921684	chr8:51211670-58216011	29	3	CNV	yes	15	yes	25	yes	5		yes	yes	yes	yes	SNTG1, PXDNL, PCMTD1, ST18, FAM150A, RB1CC1, NPBWR1, OPRK1, ATP6V1H, RGS20, TCEA1, LYPLA1, MRPL15, SOX17, RP1, XKR4, SBF1P1, TMEM68, TGS1, LYN, RPS20, SNORD54, MOS, PLAG1, CHCHD7, SDR16C5, PENK, LOC100507632, IMPAD1
8	8q12.2	rs623917	rs9692725	chr8:61730764-62067502	2	1	CNV	yes	20	yes	25	yes	10		yes		yes	yes	CHD7, LOC100130298
8	8q12.3	rs2117695	rs1217103	chr8:64192456-64787846	1	2	CNV	yes	20	yes	30	yes	5		yes		yes	yes	YTHDF3
8	8q13.2	rs11989273	rs13251311	chr8:68511093-69219699	2	1	CNV	yes	20	yes	30	yes	5		yes		yes	yes	CPA6, PREX2
8	8q13.2-8q21.13	rs578611	rs4471037	chr8:70153310-84205467	37	2	CNV	yes	25	yes	35	yes	5		yes		yes	yes	LOC100505718, SULF1, SLCO5A1, PRDM14, NCOA2, TRAM1, LOC286190, LACTB2, XKR9, EYA1, MSC, LOC100132891, TRPA1, LOC392232, LOC100128126, STAU2, GDAP1, FLJ39080, MIR2052, PI15, CRISPLD1, STMN2, HEY1, MRPS28, TPD52, ZBTB10, ZNF704, PAG1, PMP2, FABP9, FABP4, FABP12, IMPA1, SLC10A5, ZFAND1, CHMP4C, SNX16
8	8q21.3	rs16880333	rs11997212	chr8:89334480-89823176	1	1		yes	20	yes	30	yes	5		yes		yes	yes	MMP16
8	8q21.3	rs1463921	rs4419778	chr8:91912720-92260187	5	1	CNV	yes	20	yes	30	yes	5		yes		yes	yes	NECAB1, LOC100127983, TMEM55A, OTUD6B, LRRC69
8	8q22.3	rs7819498	rs1460239	chr8:105628090-105880541	1	1	CNV	yes	40	yes	40	yes	30		yes		yes	yes	LRP12
8	8q23.1	rs11997028	rs7817743	chr8:106525209-106749573	1	1		yes	40	yes	40	yes	40		yes		yes	yes	ZFPM2
8	8q23.2	rs13439408	rs1783159	chr8:110030407-110583540	4	1	CNV	yes	35	yes	40	yes	30		yes		yes	yes	TRHR, NUDCD1, ENY2, PKHD1L1
8	8q23.3	rs13250058	rs13270310	chr8:112340002-114024371	1	1		yes	35	yes	45	yes	30		yes		yes	yes	CSMD3
8	8q23.3-8q24.11	rs6469510	rs1472487	chr8:115244036-118375544	6	1	CNV	yes	35	yes	45	yes	40		yes		yes	yes	TRPS1, RAD21, RAD21-AS1, MIR3610, C8orf85, SLC30A8
8	8q24.13-8q24.3	rs6996389	rs2620636	chr8:124635537-145748936	122	14	CNV	yes	50	yes	70	yes	40		yes	yes	yes	yes	KLHL38, ANXA13, FAM91A1, FER1L6, FER1L6-AS1, TMEM65, TRMT12, RNF139, TATDN1, NDUFB9, MTSS1, LOC157381, ZNF572, SQLE, KIAA0196, NSMCE2, TRIB1, LOC100130231, FAM84B, PCAT1, POU5F1B, LOC727677, MYC, PVT1, MIR1204, MIR1205, MIR1206, MIR1207, MIR1208, LOC728724, GSDMC, FAM49B, ASAP1, LOC100507117, ASAP1-IT1, ADCY8, EFR3A, OC90, HHLA1, KCNQ3, HPYR1, LRRC6, TMEM71, PHF20L1, TG, SLA, WISP1, NDRG1, ST3GAL…
9	9p24.1-9p21.3	rs10511514	rs415026	chr9:8927478-20199723	29	1	CNV		10		15		10						PTPRD, TYRP1, C9orf150, MPDZ, FLJ41200, C9orf146, NFIB, ZDHHC21, CER1, FREM1, LOC389705, TTC39B, SNAPC3, PSIP1, C9orf93, BNC2, CNTLN, SH3GL2, ADAMTSL1, MIR3152, FAM154A, RRAGA, HAUS6, SCARNA8, PLIN2, DENND4C, RPS6, ACER2, SLC24A2
9	9p21.3-9p21.1	rs4007635	rs7035258	chr9:22492851-29257427	17	1	CNV		10		10		10						FLJ35282, ELAVL2, TUSC1, LOC100506422, C9orf82, PLAA, IFT74, LRRC19, TEK, LINC00032, C9orf11, MOB3B, IFNK, C9orf72, LINGO2, MIR876, MIR873
9	9q31.3-9q32	rs1112029	rs4979128	chr9:112351779-114329426	8	1	CNV		10		10		10						SVEP1, MUSK, LPAR1, MIR3134, SUSD1, PTBP3, HSDL2, KIAA1958
10	10p15.3-10p15.1	rs10903789	rs670804	chr10:300796-6530227	42	3	CNV		25		25		20			yes		yes	DIP2C, C10orf108, LARP4B, GTPBP4, IDI2, IDI2-AS1, IDI1, WDR37, LINC00200, ADARB2, ADARB2-AS1, LOC282980, LOC399708, PFKP, PITRM1, LOC100507034, KLF6, LOC100216001, LOC338588, AKR1E2, tAKR, AKR1C1, AKR1C2, AKR1C3, AKR1CL1, AKR1C4, UCN3, TUBAL3, NET1, CALML5, CALML3, ASB13, FAM208B, GDI2, ANKRD16, IL2RA, RBM17, PFKFB3, MIR3155A, MIR3155B, LOC399715, PRKCQ
10	10p14-10p13	rs4749999	rs10906884	chr10:10955796-15398447	37	2	CNV		20		30		15					yes	LOC254312, CELF2, USP6NL, ECHDC3, C10orf47, LOC219731, UPF2, DHTKD1, SEC61A2, NUDT5, CDC123, CAMK1D, MIR4480, LOC283070, CCDC3, OPTN, MCM10, UCMA, PHYH, SEPHS1, BEND7, PRPF18, FRMD4A, MIR1265, FAM107B, CDNF, HSPA14, SUV39H2, DCLRE1C, MEIG1, OLAH, ACBD7, C10orf111, RPP38, NMT2, LOC100192204, FAM171A1
10	10p11.23	rs4749382	rs882035	chr10:29382982-30847692	2	1	CNV		20		25		15						LOC729668, MAP3K8
10	10p11.21	rs12358845	rs12359167	chr10:37314528-38718947	9	1	CNV		20		25		20						ANKRD30A, MTRNR2L7, ZNF248, ZNF25, ZNF33A, ZNF37A, LOC100129055, HSD17B7P2, SEPT7L
10	10q11.21	rs677465	rs34257967	chr10:44052923-45522222	14	1	CNV		20		20		20						CXCL12, TMEM72-AS1, TMEM72, RASSF4, C10orf10, C10orf25, ZNF22, LOC100133308, LOC338579, MIR3156-1, OR13A1, ALOX5, MARCH8, ZFAND4
10	10q21.1	rs10762771	rs12244555	chr10:53973455-55486903	2	1	CNV		10		15		10						MBL2, PCDH15
10	10q21.1	rs12265891	rs1553571	chr10:56617236-59113536	1	1	CNV		10		15		10						MIR3924
10	10q21.2-10q21.3	rs1009984	rs12241266	chr10:64586475-65971695	4	1	CNV		10		10		15						JMJD1C, MIR1296, LOC84989, REEP3
10	10q22.2-10q23.1	rs3878053	rs4402239	chr10:75124035-85266181	52	4	CNV		15		10		20			yes		yes	AGAP5, BMS1P4, SEC24C, FUT11, CHCHD1, KIAA0913, LOC100507331, NDST2, CAMK2G, C10orf55, PLAU, VCL, AP3M1, ADK, KAT6B, DUPD1, DUSP13, SAMD8, VDAC2, COMTD1, ZNF503-AS1, ZNF503, ZNF503-AS2, C10orf11, KCNMA1, DLG5, LOC100128292, POLR3A, RPS24, LOC100132987, LOC283050, ZMIZ1, PPIF, ZCCHC24, EIF5AL1, SFTPA2, SFTPA1, LOC650623, LOC642361, LOC100288974, MBL1P, SFTPD, LOC219347, FAM213A, PLAC9, ANXA11, LOC…
10	10q23.33	rs10882185	rs1572772	chr10:94967709-95422852	6	1			5		2		5						MYOF, CEP55, O3FAR1, RBP4, PDE6C, FRA10AC1
10	10q25.2	rs12219777	rs4918760	chr10:114011511-114366255	5	1	CNV		5		10		5						TECTB, GUCY2GP, ACSL5, ZDHHC6, VTI1A
10	10q25.3-10q26.3	rs10787760	cnvi0016278	chr10:118880683-135156584	48	3	CNV		15		15		15						VAX1, MIR3663, KCNK18, SLC18A2, FGFR2, GPR26, CPXM2, CHST15, OAT, NKX1-2, LHPP, DOCK1, MGMT, EBF3, MIR4297, LOC387723, CTAGE7P, GLRX3, MIR378C, TCERG1L, FLJ46300, PPP2R2D, BNIP3, JAKMIP3, DPYSL4, STK32C, LRRC27, PWWP2B, C10orf91, TTC40, C10orf93, GPR123, KNDC1, UTF1, VENTX, MIR202, ADAM8, TUBGCP2, ZNF511, CALY, PRAP1, C10orf125, ECHS1, MIR3944, PAOX, MTG1, SPRN, LOC619207
11	11p14.3	rs1808034	rs4444035	chr11:24323915-25394729	1	1	CNV		5		10		0						LUZP2
11	11p14.1-11p12	rs10501120	rs6485172	chr11:29853673-39997866	31	2	CNV		5		15		5						KCNA4, DCDC1, DNAJC24, IMMP1L, ELP4, PAX6, DKFZp686K1684, RCN1, WT1, WT1-AS, EIF3M, CCDC73, PRRG4, QSER1, DEPDC7, TCP11L1, LINC00294, CSTF3, LOC338739, HIPK3, C11orf41, FJX1, TRIM44, LDLRAD3, MIR3973, COMMD9, PRR5L, TRAF6, RAG1, RAG2, C11orf74
11	11p11.2-11p11.12	cnvi0020152	rs11246584	chr11:48529253-51338152	6	38	CNV		40		40		50						LOC120824, LOC283116, TRIM64C, FOLH1, LOC646813, OR4A5
11	11q12.2	rs2070770	rs666886	chr11:59987107-60657688	17	1	CNV		5		5		25						MS4A1, MS4A12, MS4A13, LINC00301, MS4A8B, MS4A15, MS4A10, CCDC86, PTGDR2, ZP1, PRPF19, TMEM109, TMEM132A, SLC15A3, CD6, CD5, VPS37C
11	11q13.2-11q14.1	rs2602824	cnvi0018651	chr11:68511689-84849803	122	10	CNV		25		25		35			yes		yes	MRGPRF, TPCN2, CCND1, ORAOV1, FGF19, FGF4, FGF3, ANO1, FADD, PPFIA1, MIR548K, CTTN, SHANK2, MIR3664, FLJ42102, DHCR7, NADSYN1, KRTAP5-7, KRTAP5-8, KRTAP5-9, KRTAP5-10, KRTAP5-11, FAM86C1, DEFB108B, LOC100133315, LOC100129216, RNF121, IL18BP, NUMA1, MIR3165, LRTOMT, LAMTOR1, C11orf51, FOLR3, FOLR1, FOLR2, INPPL1, PHOX2A, CLPB, PDE2A, MIR139, ARAP1, STARD10, MIR4692, ATG16L2, FCHSD2, P2RY2, P2RY6, …
11	11q14.3	rs7948060	rs10501749	chr11:89482261-90453874	3	1	CNV		15		15		15						NAALAD2, CHORDC1, MIR4490
11	11q22.1-11q22.3	rs17133656	rs11211948	chr11:98884384-106232467	41	2	CNV		15		15		15						CNTN5, ARHGAP42, TMEM133, PGR, TRPC6, MIR3920, ANGPTL5, KIAA1377, C11orf70, YAP1, BIRC3, BIRC2, TMEM123, MMP7, MMP20, MMP27, MMP8, MMP10, LOC100288077, MMP1, MMP3, MMP12, MMP13, DCUN1D5, DYNC2H1, MIR4693, PDGFD, DDI1, CASP12, LOC643733, CASP4, CASP5, CASP1, CARD16, CARD17, CARD18, GRIA4, KIAA1826, KBTBD3, AASDHPPT, GUCY1A2
12	12p13.33	cnvi0005458	rs12312282	chr12:2746005-2972707	9	1	CNV		40	yes	45		30		yes		yes	yes	LOC283440, FKBP4, ITFG2, NRIP2, LOC100507424, FOXM1, C12orf32, TULP3, TEAD4
12	12p13.2-12p13.1	rs3782139	rs741540	chr12:11814971-12699342	11	1	CNV		30	yes	35		20		yes	yes	yes	yes	ETV6, BCL2L14, MIR1244-1, MIR1244-3, MIR1244-2, LRP6, MANSC1, LOH12CR2, LOH12CR1, DUSP16, CREBL2
12	12p12.3-12q12	rs10846451	rs11174362	chr12:16991152-38614568	79	16	CNV		25	yes	40		25		yes	yes	yes	yes	SKP1P2, MIR3974, RERGL, PIK3C2G, PLCZ1, CAPZA3, PLEKHA5, AEBP2, LOC100506393, PDE3A, SLCO1C1, SLCO1B3, SLCO1B7, SLCO1B1, SLCO1A2, IAPP, PYROXD1, RECQL, GOLT1B, C12orf39, GYS2, LDHB, KCNJ8, ABCC9, CMAS, ST8SIA1, KIAA0528, ETNK1, SOX5, MIR920, LINC00477, BCAT1, C12orf77, LRMP, CASC1, LYRM5, KRAS, IFLTD1, MIR4302, LOC100506451, RASSF8, BHLHE41, SSPN, ITPR2, ASUN, FGFR1OP2, TM7SF3, MED21, C12orf71, S…
12	12q12-12q13.11	rs1391005	rs2468940	chr12:40539586-47134988	41	6	CNV		15	yes	20		15			yes		yes	GXYLT1, YAF2, ZCRB1, PPHLN1, PRICKLE1, ADAMTS20, PUS7L, IRAK4, TWF1, TMEM117, NELL2, DBX2, RACGAP1P, PLEKHA8P1, RNY5, ANO6, LOC400027, ARID2, SCAF11, SLC38A1, SLC38A2, SLC38A4, AMIGO2, MIR4698, LOC100233209, FAM113B, RPAP3, ENDOU, RAPGEF3, SLC48A1, HDAC7, VDR, TMEM106C, COL2A1, SENP1, PFKM, ASB8, C12orf68, OR10AD1, H1FNT, ZNF641
12	12q14.2	rs17099949	rs12303938	chr12:62623072-63007487	3	1	CNV		15		15		15						SRGAP1, C12orf66, C12orf56
12	12q14.3	rs10878322	rs3891950	chr12:64406085-65150109	7	1	CNV		15		15		20						RPSAP52, HMGA2, LLPH, TMBIM4, IRAK3, HELB, GRIP1
12	12q15-12q21.1	rs6581924	rs4760925	chr12:68848255-69993670	3	1	CNV		15		15		20						CNOT2, KCNMB4, TSPAN8
12	12q21.31	rs12298640	rs7296363	chr12:81715609-82178954	1	1	CNV		10		10		15						TMTC2
12	12q21.31-12q21.32	rs17345327	rs11104217	chr12:84690428-85900810	4	1	CNV		10		15		15						RASSF9, NTS, MGAT4C, MIR548AL
12	12q24.31	rs12318072	rs12227035	chr12:123364754-123686491	3	2	CNV		20		25		15						ZNF664-FAM101A, FAM101A, NCOR2
13	13q31.1-13q31.2	rs2184263	rs1413276	chr13:85625744-87488981	3	1	CNV		5		2		10						MIR4500HG, MIR4500, SLITRK5
13	13q34	rs9550270	cnvi0017796	chr13:113538172-113922993	5	1	CNV		5		10		20						FAM70B, GAS6, FLJ41484, LOC100506394, RASA3
14	14q11.1-14q11.2	cnvi0022527	rs11621810	chr14:19086522-21660502	67	3	CNV		10		10		15			yes			POTEM, OR11H2, OR4Q3, OR4M1, OR4N2, OR4K2, OR4K5, OR4K1, OR4K15, OR4K14, OR4K13, OR4L1, OR4K17, OR4N5, OR11G2, OR11H6, OR11H4, TTC5, CCNB1IP1, SNORD126, RPPH1, PARP2, TEP1, KLHL33, OSGEP, APEX1, TMEM55B, PNP, RNASE10, RNASE9, RNASE11, RNASE12, OR6S1, ANG, RNASE4, EDDM3A, EDDM3B, RNASE6, RNASE1, RNASE3, ECRP, RNASE2, METTL17, SLC39A2, NDRG2, TPPP2, RNASE13, RNASE7, RNASE8, ARHGEF40, ZNF219, C14orf…
14	14q11.2	rs17183863	rs1951731	chr14:22668816-23433381	2	1			10		5		15						SLC7A8, HOMEZ
14	14q12	rs10151104	rs871917	chr14:28341988-31453262	14	1	CNV		10		5		15						MIR548AI, PRKD1, G2E3, SCFD1, COCH, LOC100506071, STRN3, MIR624, AP4S1, HECTD1, HEATR5A, C14orf126, GPR33, NUBPL
14	14q13.1	rs3784182	rs12587148	chr14:31946709-33058253	2	1	CNV		10		5		15						AKAP6, NPAS3
14	14q13.1-14q13.2	rs12437203	rs10162419	chr14:33852087-34321848	5	1	CNV		10		5		15						SPTSSA, EAPP, SNX6, CFL2, BAZ1A
14	14q13.3	rs712376	rs17178003	chr14:36406567-36506655	2	1			10		5		15						SLC25A21, MIR4503
14	14q22.1	rs2183614	rs4901053	chr14:48899459-50287324	14	1	CNV		5		5		10						RPS29, LRR1, RPL36AL, MGAT2, DNAAF2, POLE2, KLHDC1, KLHDC2, NEMF, CDKL1, MAP4K5, ATL1, SAV1, NIN
14	14q24.3	rs17103645	rs4243650	chr14:75280306-75602704	3	1	CNV		5		5		0						TTLL5, TGFB3, IFT43
14	14q31.3-14q32.2	rs1449108	rs1290233	chr14:84016968-96537554	8	2	CNV		10		5		15						FBLN5, TRIP11, ATXN3, NDUFB1, CPSF2, LINC00341, C14orf49, VRK1
14	14q32.33	rs12893134	rs17113331	chr14:105118950-106230905	4	1	CNV		50		50		70			yes			KIAA0125, ADAM6, LINC00226, LINC00221
15	15q12-15q13.1	rs1979372	rs6494399	chr15:25555431-27340554	3	1	CNV		5		5		5						OCA2, APBA2, FAM189A1
15	15q23	rs4776373	rs9972591	chr15:65747577-66346504	5	1	CNV		10		5		10						MAP2K5, SKOR1, PIAS1, CALML4, CLN6
15	15q24.3	rs4243047	cnvi0007662	chr15:75771535-76040290	1	2	CNV		10		5		10						LOC645752
15	15q26.2-15q26.3	rs2198997	rs4965689	chr15:93394727-98986737	22	2	CNV		15		15		10			yes			LOC400456, LOC145820, NR2F2, MIR1469, SPATA8, LOC91948, ARRDC4, FAM169B, IGF1R, MIR4714, PGPEP1L, SYNM, TTC23, LRRC28, MEF2A, LYSMD4, DNM1P46, ADAMTS17, FLJ42289, CERS3, LINS, ASB7
16	16p13.3	rs11645697	rs17135391	chr16:435663-1545607	34	1	CNV		15		15		15						RAB11FIP3, LINC00235, SOLH, MIR3176, C16orf11, NHLRC4, PIGQ, RAB40C, WFIKKN1, C16orf13, FAM195A, WDR90, LMF1, SOX8, LOC146336, SSTR5, C1QTNF8, CACNA1H, TPSG1, TPSB2, TPSAB1, TPSD1, UBE2I, BAIAP3, C16orf42, GNPTG, UNKL, C16orf91, CCDC154, CLCN7, PTX4, TELO2, IFT140, TMEM204
16	16p13.3-16p13.2	rs13338087	rs43141	chr16:4044513-6499063	33	1	CNV		15		15		15						ADCY9, SRL, LOC100507501, TFAP4, GLIS2, PAM16, CORO7-PAM16, CORO7, VASN, DNAJA3, NMRAL1, HMOX2, C16orf5, C16orf96, FAM100A, MGRN1, NUDT16L1, ANKS3, C16orf71, ZNF500, SEPT12, LOC440335, ROGDI, GLYR1, UBN1, PPL, SEC14L5, NAGPA, LOC100507589, C16orf89, ALG1, FAM86A, RBFOX1
16	16p12.3-16p12.1	rs2023767	rs17841809	chr16:19200909-23243567	21	1	CNV		5		10		10						TMC5, GDE1, CCP110, C16orf62, PDILT, ACSM5, ACSM2A, ACSM2B, ACSM1, THUMPD1, ACSM3, ERI2, LOC81691, DCUN1D3, LYRM1, DNAH3, TMEM159, ZP2, USP31, SCNN1G, SCNN1B
16	16p12.1	rs7201851	rs4238922	chr16:24486898-25694112	10	1	CNV		10		10		15						RBBP6, TNRC6A, SLC5A11, ARHGAP17, LOC554206, LCMT1, LOC100506655, AQP8, ZKSCAN2, HS3ST4
16	16p11.2	rs13331122	rs7202714	chr16:27851363-30085308	65	1	CNV		15		15		20						GSG1L, XPO6, SBK1, EIF3CL, EIF3C, CLN3, APOBR, IL27, NUPR1, CCDC101, SULT1A2, SULT1A1, ATXN2L, TUFM, MIR4721, SH2B1, ATP2A1, RABEP2, CD19, NFATC2IP, MIR4517, SPNS1, LAT, RRN3P2, RUNDC2C, LOC606724, BOLA2B, BOLA2, SLX1B, SLX1A, SLX1B-SULT1A4, SLX1A-SULT1A3, SULT1A3, SULT1A4, LOC388242, LOC613038, LOC440354, SLC7A5P1, SPN, QPRT, C16orf54, ZG16, KIF22, MAZ, PRRT2, C16orf53, MVP, CDIPT, LOC440356, SE…
16	16p11.2-16p11.1	rs3929021	rs649602	chr16:32242668-35141900	11	19	CNV		30		30		30						TP53TG3, TP53TG3B, TP53TG3C, SLC6A10P, LOC390705, LINC00273, UBE2MP1, LOC283914, LOC146481, LOC100130700, FLJ26245
17	17p13.3	cnvi0008194	rs902966	chr17:914499-1180385	3	1	CNV		5		5		5						ABR, BHLHA9, TUSC5
17	17p13.1	rs5435	rs6761	chr17:7127847-7358387	21	1	CNV		5		0		5						SLC2A4, YBX2, EIF5A, GPS2, NEURL4, ACAP1, KCTD11, TMEM95, TNK1, PLSCR3, C17orf61-PLSCR3, C17orf61, NLGN2, SPEM1, C17orf74, TMEM102, FGF11, CHRNB1, ZBTB4, SLC35G6, POLR2A
17	17q12	rs6607358	rs907092	chr17:32389367-35175785	55	1	CNV		2		2		5			yes			AATF, MIR2909, ACACA, C17orf78, TADA2A, DUSP14, SYNRG, DDX52, HNF1B, LOC284100, TBC1D3F, TBC1D3, LOC440434, MRPL45, GPR179, SOCS7, ARHGAP23, SRCIN1, C17orf96, MIR4734, MLLT6, MIR4726, CISD3, PCGF2, PSMB3, PIP4K2B, CWC25, MIR4727, C17orf98, RPL23, SNORA21, LASP1, LOC100505576, FBXO47, FLJ43826, LOC100131347, PLXDC1, ARL5C, CACNB1, RPL19, STAC2, FBXL20, MED1, CDK12, NEUROD2, PPP1R1B, STARD3, TCAP, …
17	17q21.31	rs2279191	rs105025	chr17:38925953-39342967	9	1	CNV		2		2		0						DHX8, ETV4, MEOX1, SOST, DUSP3, C17orf105, MPP3, CD300LG, MPP2
17	17q21.32	rs886444	rs8844	chr17:43406910-44053709	19	1	CNV		2		2		5			yes			CDK5RAP3, COPZ2, MIR152, NFE2L1, CBX1, SNX11, SKAP1, MIR1203, HOXB1, HOXB2, HOXB3, HOXB4, MIR10A, LOC404266, HOXB5, HOXB6, HOXB7, HOXB8, HOXB9
17	17q25.2	rs4788961	rs11655883	chr17:72481023-72746352	3	1	CNV		5		2		5						SEC14L1, LINC00338, SCARNA16
18	18q11.2-18q12.1	rs8088302	rs1849885	chr18:21539828-25192611	9	1	CNV		10		10		10			yes			SS18, PSMA8, TAF4B, KCTD1, LOC728606, AQP4, CHST9-AS1, CHST9, CDH2
18	18q12.2	rs2187048	rs9964724	chr18:33287023-33413122	1	2	CNV		20		20		20						CELF4
19	19p13.2-19p13.11	rs11259999	rs7249142	chr19:7553709-19137359	269	8	CNV		30		30		30			yes		yes	CAMSAP3, XAB2, C19orf79, PCP2, STXBP2, RETN, C19orf59, TRAPPC5, FCER2, CLEC4G, CD209, CLEC4M, CLEC4GP1, EVI5L, FLJ22184, LOC388499, LRRC8E, MAP2K7, LOC100507588, SNAPC2, CTXN1, TIMM44, ELAVL1, CCL25, FBN3, CERS4, CD320, NDUFA7, RPS28, KANK3, ANGPTL4, LOC100507567, RAB11B, MARCH2, HNRNPM, PRAM1, ZNF414, MYO1F, ADAMTS10, ACTL9, OR2Z1, ZNF558, MBD3L1, MRPL4, ICAM1, ICAM4, ICAM5, ZGLP1, FDX1L, RAVER1…
19	19p12	cnvi0009220	rs9304990	chr19:20229532-21633219	14	2	CNV		15		25		15			yes		yes	MIR1270-1, MIR1270-2, ZNF826P, ZNF737, ZNF626, ZNF85, ZNF430, ZNF714, ZNF431, ZNF708, ZNF738, ZNF493, LOC400680, ZNF429
19	19p12-19q13.11	rs8110372	rs179186	chr19:22730358-39491269	47	27	CNV		30		35		20			yes		yes	ZNF99, ZNF724P, ZNF91, ZNF675, ZNF681, RPSAP58, ZNF726, ZNF254, LOC100101266, LOC148189, LOC148145, LOC100505835, UQCRFS1, LOC284395, VSTM2B, POP4, PLEKHF1, C19orf12, CCNE1, URI1, ZNF536, DKFZp566F0947, TSHZ3, THEG5, ZNF507, DPY19L3, PDCD5, ANKRD27, RGS9BP, NUDT19, TDRD12, SLC7A9, CEP89, C19orf40, RHPN2, GPATCH1, WDR88, LRP3, SLC7A10, CEBPA, LOC80054, CEBPG, PEPD, CHST8, KCTD15, LSM14A, KIAA0355
19	19q13.12-19q13.2	rs7248731	rs10826	chr19:41514434-46504853	139	8	CNV		25		25		25			yes		yes	LOC100506930, ZFP14, ZFP82, LOC644189, ZNF566, LOC728752, ZNF260, ZNF529, ZNF382, ZNF461, ZNF567, ZNF850, LOC284408, ZNF790, ZNF345, ZNF829, ZNF568, ZNF420, ZNF585A, ZNF585B, ZNF383, LOC284412, HKR1, ZNF527, ZNF569, ZNF570, ZNF793, LOC100507433, ZNF540, ZNF571, ZFP30, ZNF781, ZNF607, ZNF573, LOC644554, LOC100631378, WDR87, SIPA1L3, DPF1, PPP1R14A, SPINT2, YIF1B, C19orf33, KCNK6, CATSPERG, PSMD8, …
19	19q13.41-19q13.42	rs10420793	cnvi0009416	chr19:58036513-60685263	28	1	CNV		15		25		15						ZNF468, ZNF320, ZNF816-ZNF321P, ZNF321P, ZNF816, ZNF702P, ERVV-1, ERVV-2, ZNF160, ZNF415, SYT5, PTPRH, TMEM86B, PPP6R1, HSPBP1, BRSK1, TMEM150B, SUV420H2, COX6B2, FAM71E2, IL11, TMEM190, TMEM238, RPL28, UBE2S, SHISA7, ISOC2, ZNF628
20	20p13	pTEL	cnvi0010430	chr20:1-1043154	16	1	CNV		30		40		10		yes			yes	DEFB125, DEFB126, DEFB127, DEFB128, DEFB129, DEFB132, C20orf96, ZCCHC3, SOX12, NRSN2, TRIB3, RBCK1, TBC1D20, CSNK2A1, RSPO4, PSMF1
20	20p12.3-20p12.1	rs1015170	rs6074712	chr20:8655927-14176081	20	1	CNV		20		30		10		yes			yes	PLCB1, PLCB4, LAMP5, PAK7, LOC100131208, ANKRD5, SNAP25, MKKS, C20orf94, JAG1, LOC339593, BTBD3, SPTLC3, ISM1, LOC100505536, TASP1, ESF1, C20orf7, SEL1L2, MACROD2
20	20q11.1-20q11.21	rs6087199	rs7268588	chr20:28134044-30617934	34	2	CNV	yes	15	yes	15	yes	10		yes	yes	yes	yes	FRG1B, MLLT10P1, DEFB115, DEFB116, DEFB118, DEFB119, DEFB121, DEFB122, DEFB123, DEFB124, REM1, LINC00028, HM13, PSIMCT-1, ID1, MIR3193, COX4I2, BCL2L1, TPX2, MYLK2, FOXS1, DUSP15, TTLL9, PDRG1, XKR7, C20orf160, HCK, TM9SF4, TSPY26P, PLAGL2, POFUT1, KIF3B, ASXL1, C20orf112
20	20q13.12	rs2425938	rs4809645	chr20:45513683-45771347	2	2	CNV	yes	30	yes	35	yes	25		yes		yes	yes	NCOA3, SULF2
20	20q13.2-20q13.33	rs6013688	rs7344065	chr20:51493399-60472738	62	3	CNV	yes	35	yes	40	yes	40		yes		yes	yes	TSHZ2, ZNF217, SUMO1P1, BCAS1, MIR4756, CYP24A1, PFDN4, DOK5, CBLN4, MC3R, FAM210B, AURKA, CSTF1, CASS4, C20orf43, GCNT7, FAM209A, FAM209B, TFAP2C, BMP7, MIR4325, SPO11, MIR5095, RAE1, MTRNR2L3, RBM38, CTCFL, PCK1, MIR4532, C20orf85, PPP4R1L, RAB22A, VAPB, APCDD1L, LOC149773, STX16, STX16-NPEPL1, NPEPL1, MIR296, MIR298, GNAS-AS1, GNAS, TH1L, CTSZ, TUBB1, ATP5E, SLMO2-ATP5E, SLMO2, ZNF831, EDN3, P…
21	21q11.2-21q21.1	rs12151976	rs2825862	chr21:14389575-20135430	19	4	CNV		5		10		5						LIPI, RBM11, ABCC13, HSPA13, SAMSN1, NRIP1, USP25, LINC00478, MIR99A, MIRLET7C, MIR125B2, C21orf37, CXADR, BTG3, C21orf91-OT1, C21orf91, CHODL-AS1, CHODL, TMPRSS15
21	21q21.1-21q21.2	rs2250907	rs2828897	chr21:21187696-24486856	4	2	CNV		5		10		5						NCAM2, LINC00317, LINC00308, D21S2088E
22	22q11.1-22q11.23	rs9606611	rs5760382	chr22:15300434-23105644	116	3	CNV		5		5		5						CCT8L2, TPTEP1, ANKRD62P1-PARP4P3, XKR3, HSFY1P1, GAB4, CECR7, IL17RA, CECR6, CECR5, CECR5-AS1, CECR1, CECR3, CECR2, SLC25A18, ATP6V1E1, BCL2L13, BID, MIR3198-1, MICAL3, GGT3P, DGCR6, PRODH, DGCR5, DGCR9, DGCR10, DGCR2, DGCR11, DGCR14, TSSK2, GSC2, SLC25A1, CLTCL1, HIRA, MRPL40, C22orf39, UFD1L, CDC45, CLDN5, LOC150185, SEPT5, SEPT5-GP1BB, GP1BB, TBX1, GNB1L, C22orf29, TXNRD2, COMT, MIR4761, ARVC…
22	22q12.1	rs392277	rs1547014	chr22:26503030-27430711	7	1	CNV		5		5		5						MN1, PITPNB, TTC28-AS1, MIR3199-1, MIR3199-2, TTC28, CHEK2
22	22q12.2-22q12.3	rs2008880	rs739009	chr22:28243801-30797651	50	2	CNV		5		5		5			yes			THOC5, NIPSNAP1, NF2, CABP7, ZMAT5, UQCR10, ASCC2, MTMR3, HORMAD2, LIF, OSM, GATSL3, TBC1D10A, SF3A1, CCDC157, RNF215, SEC14L2, MTFP1, SEC14L3, SDC4P, SEC14L4, SEC14L6, GAL3ST1, PES1, TCN2, SLC35E4, DUSP18, OSBP2, MIR3200, MORC2-AS1, MORC2, TUG1, SMTN, SELM, INPP5J, PLA2G3, MIR3928, RNF185, LIMK2, PIK3IP1, PATZ1, DRG1, EIF4ENIF1, SFI1, PISD, PRR14L, DEPDC5, C22orf24, YWHAH, SLC5A1
22	22q12.3	rs2235171	rs5756391	chr22:30980200-35628290	24	4	CNV		5		2		5						SLC5A4, RFPL3, RFPL3-AS1, LOC339666, LARGE, LOC100506195, ISX, HMGXB4, TOM1, MIR3909, HMOX1, MCM5, RASD2, MB, APOL6, APOL5, RBFOX2, APOL2, APOL1, MYH9, CACNG2, IFT27, PVALB, NCF4
22	22q13.1	rs1997644	rs4821792	chr22:37045168-37272872	5	1	CNV		5		5		5						LOC400927, KCNJ4, KDELR3, DDX17, DMC1
X	Xp22.12	rs11795873	rs5904577	chrX:19588579-21604594	10	1	CNV		5		2		5						SH3KBP1, CXorf23, LOC729609, MAP7D2, MIR23C, EIF1AX, SCARNA9L, RPS6KA3, CNKSR2, KLHL34
X	Xp11.23-Xp11.22	rs3014658	rs9887724	chrX:48041623-50470543	75	2	CNV		5		5		5						SSX3, SSX4, SSX4B, SLC38A5, FTSJ1, PORCN, EBP, TBC1D25, RBM3, WDR13, WAS, SUV39H1, GLOD5, GATA1, HDAC6, ERAS, PCSK1N, TIMM17B, PQBP1, SLC35A2, PIM2, OTUD5, KCND1, GRIPAP1, TFE3, CCDC120, PRAF2, WDR45, GPKOW, MAGIX, PLP2, PRICKLE3, SYP, CACNA1F, CCDC22, FOXP3, PPP1R3F, GAGE10, GAGE12J, GAGE13, GAGE8, GAGE2E, GAGE2D, GAGE2A, GAGE2C, GAGE4, GAGE5, GAGE12I, GAGE7, GAGE12F, GAGE2B, GAGE12D, GAGE12C, G…
X	Xp11.1-Xq12	rs17317308	rs1264215	chrX:58021381-65337334	8	19	CNV		20		15		25						ZC4H2, ZC3H12B, LAS1L, FRMD8P1, MSN, MIR223, VSIG4, HEPH
X	Xq22.1	rs2222905	rs11795958	chrX:98240282-99080835	1	1	CNV		5		2		5						LOC442459
X	Xq23	rs12156686	rs11260309	chrX:115160992-115664254	3	1	CNV		5		2		5						AGTR2, SLC6A14, CXorf61
X	Xq25	rs4825904	rs7055037	chrX:123391620-123700055	1	1	CNV		5		5		10						ODZ1
X	Xq25-Xq26.1	rs28473050	cnvi0003591	chrX:124546093-130170628	6	1	CNV		5		5		10						DCAF12L2, DCAF12L1, CXorf64, ACTRT1, ENOX2, ARHGAP36
X	Xq27.2-Xq27.3	rs2179195	rs4131467	chrX:140843065-145942317	6	1	CNV		5		2		5						SPANXN3, SLITRK4, SPANXN2, UBE2NL, CXorf51A, CXorf51B
X	Xq28	rs5940372	rs543053	chrX:154390570-154579620	1	1	CNV		10		10		10						TMLHE
HGSC, high-grade serous carcinoma; CHR, chromosome; CNV copy number variation
