# Supplementary material for: The Genomic Landscape of TP53 and p53 Annotated High Grade Ovarian Serous Carcinomas from a Defined Founder Population Associated with Patient Outcome
Source: PLoS One. 2012 Sep 20;7(9):e45484. doi: 10.1371/journal.pone.0045484 (PMC3447752; doi:10.1371/journal.pone.0045484)
Supplement: Table S6 — Amplicons identified in TP53 mutation positive HGSC samples, containing no genes. Legend: HGSC, high-grade ovarian serous carcinoma; CHR, chromosome; CNV copy number variation. (XLS) [file pone.0045484.s006.xls]

## Sheet: Amplicons-containing no genes
Supplementary Table 6. Amplicons identified in TP53 mutation positive HGSC samples, containing no genes
CHR	Cytoband	Flanking SNP-start	Flanking SNP-end	Coordinates	Number of genes mapping to amplicon	Number of samples with amplification	Overlaps known CNV?	Overlaps global region of gain (TP53 mutation positive samples)?	% samples with focal gain of region (TP53 mutation positive samples)	Overlaps global region of loss (p53 immuno positive samples)?	% samples with focal gain of region (p53 immuno positive samples)	Overlaps global region of loss (p53 immuno negative samples)?	% samples with focal gain of region (p53 immuno negative samples)		Overlaps global region of gain identified by TCGA, 2011?	Overlaps focal region of gain identified by TCGA, 2011?	Overlaps global region of gain identified by Gorringe et al., 2010?	Overlaps focal region of gain identified by Gorringe et al., 2010?
1	1q25.3	rs11582767	rs12141165	chr1:179393126-179573225	0	1	CNV		30	yes	35		15					yes
2	2p25.3	cnvi0009470	rs7609512	chr2:58447-241673	0	1	CNV		35		35		35					yes
2	2p22.3	rs773828	rs11124448	chr2:33957050-35609489	0	1	CNV		25		25		25					yes
2	2q12.3	rs1404140	rs10496413	chr2:106901861-107473982	0	1	CNV		15		25		5
2	2q14.1	rs13401508	rs2130980	chr2:116458448-116966393	0	1			10		15		15
2	2q14.3	rs28703141	rs6741528	chr2:126659862-127112701	0	1	CNV		15		15		15
2	2q32.1	rs263767	rs4300794	chr2:185640560-186121369	0	1	CNV		20		15		25
3	3p11.1-3q11.2	rs13059313	rs9713029	chr3:90277312-95041616	0	1			40		35		50					yes
3	3q13.11-3q13.12	rs920937	rs1712541	chr3:107770703-108116324	0	1	CNV	yes	15	yes	15	yes	15		yes		yes	yes
4	4q28.3	rs7690467	rs6534907	chr4:133545845-133962776	0	1	CNV		5		2		10
4	4q31.23	rs4835147	rs6832401	chr4:150059362-150867831	0	1			5		5		10
5	5p14.1	rs6891780	rs4133400	chr5:28149964-28551085	0	1	CNV		30		25		25					yes
7	7q11.1-7q11.21	cnvi0021217	cnvi0001081	chr7:61074213-62238968	0	12	CNV		60	yes	60	yes	70
7	7q21.11	rs2522370	rs1396583	chr7:83852556-85258090	0	1	CNV		15	yes	15	yes	15					yes
8	8p23.2	rs6983919	rs10092548	chr8:5152875-5663466	0	1	CNV		5		5		0
11	11p12	rs12285478	rs10501269	chr11:41268936-41556543	0	1	CNV		4		5		10
11	11q22.1	rs11212729	rs12796171	chr11:97162725-97961695	0	1	CNV		15		10		20
12	12q15	rs4913442	cnvi0005687	chr12:67061503-67233157	0	1			15		15		20			yes
14	14q11.1	cnvi0022555	cnvi0020268	chr14:18210177-18426389	0	8	CNV		60		55		65
14	14q23.3	rs8007846	rs8021730	chr14:65332716-66956534	0	1	CNV		5		5		5
15	15q26.3	rs12915600	rs8036586	chr15:99855506-99969565	0	1	CNV		15		15		10
HGSC, high-grade serous carcinoma; CHR, chromosome; CNV copy number variation
