# Supplementary material for: The Genomic Landscape of TP53 and p53 Annotated High Grade Ovarian Serous Carcinomas from a Defined Founder Population Associated with Patient Outcome
Source: PLoS One. 2012 Sep 20;7(9):e45484. doi: 10.1371/journal.pone.0045484 (PMC3447752; doi:10.1371/journal.pone.0045484)
Supplement: Table S7 — A) Number of RefSeq genes mapping to approximate regions of gain in p53-positive HGSC cases as compared to p53-negative HGSC cases. B) Lists of RefSeq genes mapping to approximate regions of gain in p53-positive HGSC cases as compared to p53-negative HGSC cases. RefSeq genes extracted from UCSC table browser based on the March 2006 NCBI36/hg18 (Build 36.1) assembly of the human reference sequence (genome.ucsc.edu). (XLS) [file pone.0045484.s007.xls]

## Sheet: All genes in regions of gain
Supplementary Table 7A. Number of RefSeq genes mapping to approximate regions of gain in p53-positive HGSC cases as compared to p53-negative HGSC cases
Chromosome	Genomic position of region of gain (megabases)	Number of RefSeq genes*
1	150-215	727
8	50-95	188
12	20-33	73
*RefSeq genes extracted from UCSC table browser, based on the March 2006 NCBI36/hg18 (Build 36.1) assembly of the human reference sequence (genome.ucsc.edu)
Supplementary Table 7B. Lists of RefSeq genes mapping to approximate regions of gain in p53-positive HGSC cases as compared to p53-negative HGSC cases
Chromosome	Genomic coordinate of gene start	RefSeq gene name		Chromosome	Genomic coordinate of gene start	RefSeq gene name		Chromosome	Genomic coordinate of gene start	RefSeq gene name
chr1	150002068	OAZ3		chr8	50147455	C8orf22		chr12	20058885	LOC100506393
chr1	150010664	TDRKH		chr8	50987149	SNTG1		chr12	20413445	PDE3A
chr1	150039388	LINGO4		chr8	52394689	PXDNL		chr12	20739555	SLCO1C1
chr1	150045170	RORC		chr8	52892692	PCMTD1		chr12	20854904	SLCO1B3
chr1	150076962	C2CD4D		chr8	53185944	ST18		chr12	21059896	SLCO1B7
chr1	150077568	LOC100132111		chr8	53609149	FAM150A		chr12	21175394	SLCO1B1
chr1	150086200	THEM5		chr8	53697570	RB1CC1		chr12	21308800	SLCO1A2
chr1	150109966	THEM4		chr8	54015020	NPBWR1		chr12	21417068	IAPP
chr1	150222009	S100A10		chr8	54300828	OPRK1		chr12	21481804	PYROXD1
chr1	150271605	S100A11		chr8	54790667	ATP6V1H		chr12	21513110	RECQL
chr1	150323243	TCHHL1		chr8	54926920	RGS20		chr12	21545965	GOLT1B
chr1	150345416	TCHH		chr8	55041668	TCEA1		chr12	21570522	C12orf39
chr1	150392694	RPTN		chr8	55121490	LYPLA1		chr12	21580389	GYS2
chr1	150451181	HRNR		chr8	55210333	MRPL15		chr12	21679541	LDHB
chr1	150541274	FLG		chr8	55533047	SOX17		chr12	21809155	KCNJ8
chr1	150587836	FLG2		chr8	55691179	RP1		chr12	21841590	ABCC9
chr1	150648342	CRNN		chr8	56177570	XKR4		chr12	22090425	CMAS
chr1	150749943	LCE5A		chr8	56524310	SBF1P1		chr12	22237591	ST8SIA1
chr1	150753601	CRCT1		chr8	56813873	TMEM68		chr12	22492784	KIAA0528
chr1	150804753	LCE3E		chr8	56848344	TGS1		chr12	22669342	ETNK1
chr1	150818483	LCE3D		chr8	56954939	LYN		chr12	23576497	SOX5
chr1	150839761	LCE3C		chr8	57143292	RPS20		chr12	24256621	MIR920
chr1	150852910	LCE3B		chr8	57148951	SNORD54		chr12	24611164	LINC00477
chr1	150861933	LCE3A		chr8	57188054	MOS		chr12	24854224	BCAT1
chr1	150902495	LCE2D		chr8	57236021	PLAG1		chr12	25037631	C12orf77
chr1	150914394	LCE2C		chr8	57286868	CHCHD7		chr12	25096447	LRMP
chr1	150925222	LCE2B		chr8	57375123	SDR16C5		chr12	25152489	CASC1
chr1	150937463	LCE2A		chr8	57516066	PENK		chr12	25239416	LYRM5
chr1	150948146	LCE4A		chr8	57593431	LOC100507632		chr12	25249446	KRAS
chr1	150958621	C1orf68		chr8	58033041	IMPAD1		chr12	25520282	IFLTD1
chr1	150997129	KPRP		chr8	58294201	LOC100507651		chr12	25918219	MIR4302
chr1	151015471	LCE1F		chr8	58336338	LOC286177		chr12	25998854	LOC100506451
chr1	151025376	LCE1E		chr8	58354655	C8orf71		chr12	26003230	RASSF8
chr1	151035850	LCE1D		chr8	59069666	FAM110B		chr12	26164225	BHLHE41
chr1	151043934	LCE1C		chr8	59486376	UBXN2B		chr12	26239535	SSPN
chr1	151051070	LCE1B		chr8	59565290	CYP7A1		chr12	26379551	ITPR2
chr1	151066572	LCE1A		chr8	59628281	SDCBP		chr12	26949378	ASUN
chr1	151081953	LCE6A		chr8	59658617	NSMAF		chr12	26982571	FGFR1OP2
chr1	151117421	SMCP		chr8	59880530	TOX		chr12	27015772	TM7SF3
chr1	151147662	IVL		chr8	61263976	CA8		chr12	27066749	MED21
chr1	151209751	SPRR4		chr8	61592022	RAB2A		chr12	27125256	C12orf71
chr1	151223187	SPRR1A		chr8	61753877	CHD7		chr12	27288344	STK38L
chr1	151240846	SPRR3		chr8	62041233	LOC100130298		chr12	27377053	ARNTL2
chr1	151270302	SPRR1B		chr8	62363078	CLVS1		chr12	27511009	C12orf70
chr1	151278824	SPRR2D		chr8	62575668	ASPH		chr12	27568311	PPFIBP1
chr1	151295219	SPRR2A		chr8	62789900	MIR4470		chr12	27740694	REP15
chr1	151309340	SPRR2B		chr8	63324054	NKAIN3		chr12	27754972	MRPS35
chr1	151332234	SPRR2E		chr8	64052973	UG0898H09		chr12	27806865	MANSC4
chr1	151351236	SPRR2F		chr8	64090192	GGH		chr12	27824453	KLHDC5
chr1	151379217	SPRR2C		chr8	64134601	TTPA		chr12	28002283	PTHLH
chr1	151388681	SPRR2G		chr8	64243674	YTHDF3		chr12	28301399	CCDC91
chr1	151442542	LELP1		chr8	64844541	LOC286184		chr12	29267864	FAR2
chr1	151456683	PRR9		chr8	65448328	LOC100130155		chr12	29384845	ERGIC2
chr1	151498802	LOR		chr8	65454259	MIR124-2		chr12	29471755	OVCH1
chr1	151536961	PGLYRP3		chr8	65649419	LOC401463		chr12	29545012	TMTC1
chr1	151569220	PGLYRP4		chr8	65655348	BHLHE22		chr12	30673181	IPO8
chr1	151596953	S100A9		chr8	65671082	CYP7B1		chr12	30753752	CAPRIN2
chr1	151612807	S100A12		chr8	66235933	LINC00251		chr12	30839881	LOC100287314
chr1	151629131	S100A8		chr8	66601796	LOC286186		chr12	30971104	TSPAN11
chr1	151655623	S100A7A		chr8	66677244	ARMC1		chr12	31064963	LOC100506660
chr1	151676094	S100A7L2		chr8	66719441	MTFR1		chr12	31118045	DDX11
chr1	151696843	S100A7		chr8	66789122	PDE7A		chr12	31324786	FAM60A
chr1	151773699	S100A6		chr8	67096344	DNAJC5B		chr12	31368516	FLJ13224
chr1	151776246	S100A5		chr8	67201831	TRIM55		chr12	31426423	DENND5B
chr1	151782718	S100A4		chr8	67251165	CRH		chr12	31691360	METTL20
chr1	151786432	S100A3		chr8	67266902	LOC100505659		chr12	31715337	AMN1
chr1	151800208	S100A2		chr8	67494375	LOC100505676		chr12	31835385	H3F3C
chr1	151845990	S100A16		chr8	67503816	RRS1		chr12	32003619	C12orf35
chr1	151853355	S100A14		chr8	67507271	ADHFE1		chr12	32151451	BICD1
chr1	151857899	S100A13		chr8	67568044	C8orf46		chr12	32546307	FGD4
chr1	151867496	S100A1		chr8	67636963	MYBL1		chr12	32723403	DNM1L
chr1	151873081	CHTOP		chr8	67705041	VCPIP1		chr12	32790744	YARS2
chr1	151897768	SNAPIN		chr8	67742340	C8orf44-SGK3		chr12	32834946	PKP2
chr1	151901137	ILF2		chr8	67742340	C8orf44
chr1	151917787	NPR1		chr8	67787206	SGK3
chr1	151967190	INTS3		chr8	67842185	PTTG3P
chr1	152014391	SLC27A3		chr8	67945537	C8orf45
chr1	152043826	GATAD2B		chr8	67996718	SNHG6
chr1	152168600	DENND4B		chr8	67997262	SNORD87
chr1	152186771	CRTC2		chr8	68021289	TCF24
chr1	152198211	SLC39A1		chr8	68062920	PPP1R42
chr1	152206938	CREB3L4		chr8	68117868	COPS5
chr1	152213368	JTB		chr8	68139156	CSPP1
chr1	152220751	RAB13		chr8	68272437	ARFGEF1
chr1	152229862	RPS27		chr8	68496958	CPA6
chr1	152231789	NUP210L		chr8	69027156	PREX2
chr1	152394403	TPM3		chr8	69378256	LOC286189
chr1	152432764	MIR190B		chr8	69405510	C8orf34
chr1	152438471	C1orf189		chr8	69986591	LOC100505718
chr1	152445806	C1orf43		chr8	70541412	SULF1
chr1	152459278	UBAP2L		chr8	70747121	SLCO5A1
chr1	152511662	HAX1		chr8	71126439	PRDM14
chr1	152560215	AQP10		chr8	71186820	NCOA2
chr1	152564659	ATP8B2		chr8	71648006	TRAM1
chr1	152644292	IL6R		chr8	71683365	LOC286190
chr1	152718577	SHE		chr8	71712054	LACTB2
chr1	152741318	TDRD10		chr8	71744153	XKR9
chr1	152787674	UBE2Q1		chr8	72272221	EYA1
chr1	152806880	CHRNB2		chr8	72916330	MSC
chr1	152821157	ADAR		chr8	72917911	LOC100132891
chr1	152936565	KCNN3		chr8	73096039	TRPA1
chr1	153163831	PMVK		chr8	73280087	LOC392232
chr1	153183179	PBXIP1		chr8	73612179	KCNB2
chr1	153196125	PYGO2		chr8	74083650	TERF1
chr1	153201397	SHC1		chr8	74139331	C8orf84
chr1	153213741	CKS1B		chr8	74316212	LOC100130301
chr1	153214792	MIR4258		chr8	74365427	RPL7
chr1	153222393	FLAD1		chr8	74369390	RDH10
chr1	153232685	LENEP		chr8	74494862	LOC100128126
chr1	153241729	ZBTB7B		chr8	74495157	STAU2
chr1	153257626	DCST2		chr8	74865393	UBE2W
chr1	153272905	DCST1		chr8	75019926	TCEB1
chr1	153284291	LOC100505666		chr8	75050930	TMEM70
chr1	153290385	ADAM15		chr8	75066117	LY96
chr1	153302836	EFNA4		chr8	75309492	JPH1
chr1	153317971	EFNA3		chr8	75425172	GDAP1
chr1	153366972	EFNA1		chr8	75674655	FLJ39080
chr1	153374911	SLC50A1		chr8	75780482	MIR2052
chr1	153378990	DPM3		chr8	75899326	PI15
chr1	153408507	KRTCAP2		chr8	76059262	CRISPLD1
chr1	153412983	TRIM46		chr8	76614757	HNF4G
chr1	153424923	MUC1		chr8	77685668	LOC100192378
chr1	153431591	MIR92B		chr8	77756069	ZFHX4
chr1	153432002	THBS3		chr8	78055048	PEX2
chr1	153445113	MTX1		chr8	79590890	PKIA
chr1	153450239	GBAP1		chr8	79740836	ZC2HC1A
chr1	153470862	GBA		chr8	79807561	IL7
chr1	153483619	FAM189B		chr8	80685603	STMN2
chr1	153492393	SCAMP3		chr8	80838799	HEY1
chr1	153499282	CLK2		chr8	80993649	MRPS28
chr1	153513997	HCN3		chr8	81109659	TPD52
chr1	153525707	PKLR		chr8	81561002	ZBTB10
chr1	153545162	FDPS		chr8	81703240	ZNF704
chr1	153556874	RUSC1-AS1		chr8	82042600	PAG1
chr1	153557263	RUSC1		chr8	82355272	FABP5
chr1	153571675	ASH1L		chr8	82515118	PMP2
chr1	153582764	MIR555		chr8	82533172	FABP9
chr1	153669594	POU5F1P4		chr8	82553286	FABP4
chr1	153798395	LOC645676		chr8	82599835	FABP12
chr1	153846584	MSTO1		chr8	82731705	IMPA1
chr1	153895856	YY1AP1		chr8	82768445	SLC10A5
chr1	153925505	DAP3		chr8	82776120	ZFAND1
chr1	153982232	MSTO2P		chr8	82807242	CHMP4C
chr1	153986133	GON4L		chr8	82874372	SNX16
chr1	154095883	SYT11		chr8	85258007	RALYL
chr1	154134224	RIT1		chr8	86206574	LRRCC1
chr1	154149459	KIAA0907		chr8	86276870	E2F5
chr1	154156323	SNORA42		chr8	86313539	C8orf59
chr1	154162372	SCARNA4		chr8	86344967	CA13
chr1	154178103	RXFP4		chr8	86427709	CA1
chr1	154183253	ARHGEF2		chr8	86538307	CA3
chr1	154245462	SSR2		chr8	86563382	CA2
chr1	154271715	UBQLN4		chr8	86754079	REXO1L2P
chr1	154291140	LAMTOR2		chr8	86755946	REXO1L1
chr1	154297589	RAB25		chr8	87129806	PSKH2
chr1	154308427	MEX3A		chr8	87180254	ATP6V0D2
chr1	154351084	LMNA		chr8	87295403	SLC7A13
chr1	154386358	SEMA4A		chr8	87424109	WWP1
chr1	154430353	SLC25A44		chr8	87553693	FAM82B
chr1	154449402	PMF1-BGLAP		chr8	87595771	CPNE3
chr1	154449402	PMF1		chr8	87655278	CNGB3
chr1	154478574	BGLAP		chr8	87947791	CNBD1
chr1	154479830	PAQR6		chr8	88952086	DCAF4L2
chr1	154485638	SMG5		chr8	89118575	MMP16
chr1	154519327	TMEM79		chr8	90839109	RIPK2
chr1	154529107	C1orf85		chr8	90983268	OSGIN2
chr1	154535038	VHLL		chr8	91014739	NBN
chr1	154545375	CCT3		chr8	91082755	DECR1
chr1	154573728	C1orf182		chr8	91140013	CALB1
chr1	154605603	RHBG		chr8	91703398	TMEM64
chr1	154640678	C1orf61		chr8	91873096	NECAB1
chr1	154656756	MIR9-1		chr8	92039881	LOC100127983
chr1	154700142	MEF2D		chr8	92075674	TMEM55A
chr1	154761820	IQGAP3		chr8	92151599	OTUD6B
chr1	154816142	TTC24		chr8	92184022	LRRC69
chr1	154828181	APOA1BP		chr8	92286888	MIR4661
chr1	154830723	GPATCH4		chr8	92330691	SLC26A7
chr1	154855709	HAPLN2		chr8	93036370	RUNX1T1
chr1	154878363	BCAN		chr8	93794365	FLJ46284
chr1	154905179	NES		chr8	93964933	C8orf83
chr1	154936023	CRABP2		chr8	94215499	LOC389676
chr1	154959036	ISG20L2		chr8	94427870	LINC00535
chr1	154964886	RRNAD1		chr8	94781948	FAM92A1
chr1	154973717	MRPL24		chr8	94812903	RBM12B
chr1	154978522	HDGF		chr8	94821514	C8orf39
chr1	155003897	PRCC		chr8	94836247	TMEM67
chr1	155042658	SH2D2A		chr8	94997425	MIR378D2
chr1	155052165	NTRK1		chr8	94998258	PDP1
chr1	155077288	INSRR
chr1	155130146	PEAR1
chr1	155157047	LRRC71
chr1	155171255	ARHGEF11
chr1	155172546	MIR765
chr1	155328458	ETV3L
chr1	155361082	ETV3
chr1	155364777	CYCSP52
chr1	155749790	FCRL5
chr1	155810162	FCRL4
chr1	155914601	FCRL3
chr1	155982146	FCRL2
chr1	156030817	FCRL1
chr1	156067327	CD5L
chr1	156229686	KIRREL
chr1	156368457	LOC646268
chr1	156416360	CD1D
chr1	156490550	CD1A
chr1	156526186	CD1C
chr1	156564363	CD1B
chr1	156590109	CD1E
chr1	156634935	OR10T2
chr1	156656341	OR10K2
chr1	156701975	OR10K1
chr1	156716291	OR10R2
chr1	156783541	OR6Y1
chr1	156799064	OR6P1
chr1	156815332	OR10X1
chr1	156842852	OR10Z1
chr1	156847119	SPTA1
chr1	156936091	OR6K2
chr1	156953581	OR6K3
chr1	156991229	OR6K6
chr1	157002157	OR6N1
chr1	157013095	OR6N2
chr1	157067791	MNDA
chr1	157167960	PYHIN1
chr1	157246305	IFI16
chr1	157298898	AIM2
chr1	157408000	CADM3
chr1	157432398	LOC100131825
chr1	157440426	DARC
chr1	157526127	FCER1A
chr1	157550083	OR10J3
chr1	157676135	OR10J1
chr1	157771491	OR10J5
chr1	157824239	APCS
chr1	157948702	CRP
chr1	158017382	DUSP23
chr1	158038796	FCRL6
chr1	158063102	SLAMF8
chr1	158070887	C1orf204
chr1	158090729	VSIG8
chr1	158108777	CCDC19
chr1	158154526	TAGLN2
chr1	158163452	IGSF9
chr1	158187905	SLAMF9
chr1	158197637	LOC100505633
chr1	158264085	PIGM
chr1	158273880	KCNJ10
chr1	158317983	KCNJ9
chr1	158327752	IGSF8
chr1	158352143	ATP1A2
chr1	158387975	ATP1A4
chr1	158426908	CASQ1
chr1	158441748	PEA15
chr1	158452128	DCAF8
chr1	158513222	PEX19
chr1	158525000	COPA
chr1	158553678	SUMO1P3
chr1	158579686	NCSTN
chr1	158603484	NHLH1
chr1	158636987	VANGL2
chr1	158721443	SLAMF6
chr1	158777507	CD84
chr1	158846514	SLAMF1
chr1	158915159	CD48
chr1	158975700	SLAMF7
chr1	159032551	LY9
chr1	159066573	CD244
chr1	159112953	ITLN1
chr1	159181439	ITLN2
chr1	159231624	F11R
chr1	159274044	TSTD1
chr1	159275664	USF1
chr1	159283355	ARHGAP30
chr1	159307404	PVRL4
chr1	159334774	KLHDC9
chr1	159336969	PFDN2
chr1	159354485	NIT1
chr1	159357391	DEDD
chr1	159390157	UFC1
chr1	159395877	USP21
chr1	159402804	PPOX
chr1	159407723	B4GALT3
chr1	159426161	ADAMTS4
chr1	159435728	NDUFS2
chr1	159451710	FCER1G
chr1	159458706	APOA2
chr1	159462456	TOMM40L
chr1	159466079	NR1I3
chr1	159495140	PCP4L1
chr1	159541148	MPZ
chr1	159550789	SDHC
chr1	159601144	C1orf192
chr1	159741828	FCGR2A
chr1	159760659	HSPA6
chr1	159778174	FCGR3A
chr1	159817752	FCGR2C
chr1	159842472	HSPA7
chr1	159859611	FCGR3B
chr1	159899528	FCGR2B
chr1	159920118	RPL31P11
chr1	159943385	FCRLA
chr1	159959080	FCRLB
chr1	159986204	DUSP12
chr1	160002657	ATF6
chr1	160219605	OLFML2B
chr1	160306204	NOS1AP
chr1	160393520	MIR4654
chr1	160578959	MIR556
chr1	160610138	C1orf111
chr1	160615319	C1orf226
chr1	160631679	SH2D1B
chr1	160733587	UHMK1
chr1	160797919	UAP1
chr1	160868851	DDR2
chr1	161027119	HSD17B7
chr1	161090710	C1orf110
chr1	161305019	RGS4
chr1	161378712	RGS5
chr1	161558346	NUF2
chr1	162795220	PBX1
chr1	163004976	LOC100505795
chr1	163437727	LMX1A
chr1	163636782	RXRG
chr1	163712702	LOC400794
chr1	163780101	LRRC52
chr1	163866733	MGST3
chr1	163898072	ALDH9A1
chr1	163934610	LOC440700
chr1	163960151	TMCO1
chr1	164063355	UCK2
chr1	164143781	MIR3658
chr1	164305879	FAM78B
chr1	164390603	MIR921
chr1	164839776	FMO9P
chr1	165075347	POGK
chr1	165092372	TADA1
chr1	165149064	ILDR2
chr1	165225142	MAEL
chr1	165288705	GPA33
chr1	165330710	DUSP27
chr1	165456689	POU2F1
chr1	165666500	CD247
chr1	165776874	CREG1
chr1	165866097	RCSD1
chr1	165957810	MPZL1
chr1	166045248	ADCY10
chr1	166152536	BRP44
chr1	166172420	DCAF6
chr1	166320620	GPR161
chr1	166414794	TIPRL
chr1	166461878	SFT2D2
chr1	166481442	ANKRD36BP1
chr1	166516901	TBX19
chr1	166611385	MIR557
chr1	166636050	LOC100505918
chr1	166776626	XCL2
chr1	166812334	XCL1
chr1	166931318	DPT
chr1	167022802	MGC4473
chr1	167342570	ATP1B1
chr1	167368392	NME7
chr1	167603817	BLZF1
chr1	167630737	C1orf114
chr1	167699772	SLC19A2
chr1	167747815	F5
chr1	167824711	SELP
chr1	167926429	SELL
chr1	167958404	SELE
chr1	168028295	METTL18
chr1	168031173	C1orf112
chr1	168088427	SCYL3
chr1	168157093	KIFAP3
chr1	168381811	METTL11B
chr1	168387142	MIR3119-2
chr1	168387142	MIR3119-1
chr1	168507169	LOC284688
chr1	168767886	GORAB
chr1	168899936	PRRX1
chr1	169171235	C1orf129
chr1	169326641	FMO3
chr1	169337492	MIR1295A
chr1	169373502	FMO6P
chr1	169421011	FMO2
chr1	169484286	FMO1
chr1	169550109	FMO4
chr1	169574658	TOP1P1
chr1	169721289	PRRC2C
chr1	169871179	MYOC
chr1	169935918	VAMP4
chr1	170017383	METTL13
chr1	170077243	DNM3
chr1	170374346	DNM3OS
chr1	170374560	MIR214
chr1	170374570	MIR3120
chr1	170380297	MIR199A2
chr1	170656450	C1orf105
chr1	170677219	PIGC
chr1	170768882	C1orf9
chr1	170894807	FASLG
chr1	171276982	TNFSF18
chr1	171419492	TNFSF4
chr1	171470821	LOC100506023
chr1	171713108	PRDX6
chr1	171736226	SLC9A11
chr1	171844097	ANKRD45
chr1	171871283	LOC730159
chr1	171950702	KLHL20
chr1	172035310	CENPL
chr1	172060419	DARS2
chr1	172099008	LOC100506046
chr1	172099661	GAS5
chr1	172099935	SNORD81
chr1	172100129	SNORD47
chr1	172100593	SNORD80
chr1	172101110	SNORD79
chr1	172101393	SNORD78
chr1	172101728	SNORD44
chr1	172102071	SNORD77
chr1	172102395	SNORD76
chr1	172102639	SNORD75
chr1	172103434	SNORD74
chr1	172104115	ZBTB37
chr1	172139564	SERPINC1
chr1	172166974	RC3H1
chr1	172395174	RABGAP1L
chr1	172683834	GPR52
chr1	173235193	CACYBP
chr1	173248716	MRPS14
chr1	173303616	TNN
chr1	173392745	KIAA0040
chr1	173558557	TNR
chr1	174180589	RFWD2
chr1	174204155	SCARNA3
chr1	174698929	PAPPA2
chr1	175096825	ASTN1
chr1	175265121	MIR488
chr1	175407255	FAM5B
chr1	176164864	SEC16B
chr1	176241897	LOC730102
chr1	176327265	LOC100302401
chr1	176329486	RASAL2
chr1	176748834	C1orf49
chr1	176778553	C1orf220
chr1	176913506	MIR4424
chr1	176960922	RALGPS2
chr1	177085292	ANGPTL1
chr1	177261696	FAM20B
chr1	177317734	TOR3A
chr1	177335084	ABL2
chr1	177529471	SOAT1
chr1	177601477	AXDND1
chr1	177786296	NPHS2
chr1	177827370	TDRD5
chr1	177978920	FAM163A
chr1	178075724	TOR1AIP2
chr1	178118042	TOR1AIP1
chr1	178190530	CEP350
chr1	178390590	QSOX1
chr1	178433766	FLJ23867
chr1	178466055	LHX4
chr1	178505420	LOC100527964
chr1	178523974	ACBD6
chr1	178674071	MIR3121
chr1	178867768	XPR1
chr1	179148935	KIAA1614
chr1	179208798	STX6
chr1	179269183	MR1
chr1	179324260	IER5
chr1	179472146	GM140
chr1	179719308	CACNA1E
chr1	180290327	ZNF648
chr1	180617461	GLUL
chr1	180633874	TEDDM1
chr1	180643378	LINC00272
chr1	180685878	RGSL1
chr1	180809391	RNASEL
chr1	180834380	RGS16
chr1	180850897	LOC284648
chr1	180882414	RGS8
chr1	181025206	NPL
chr1	181075061	DHX9
chr1	181135622	SHCBP1L
chr1	181259217	LAMC1
chr1	181421796	LAMC2
chr1	181483994	NMNAT2
chr1	181696631	DKFZP564C196
chr1	181708128	SMG7
chr1	181791319	NCF2
chr1	181861954	ARPC5
chr1	181871830	RGL1
chr1	181882033	APOBEC4
chr1	182171588	GLT25D2
chr1	182287433	TSEN15
chr1	182622772	C1orf21
chr1	182926247	EDEM3
chr1	183026788	FAM129A
chr1	183281173	RNF2
chr1	183353840	TRMT1L
chr1	183392814	SWT1
chr1	183532144	IVNS1ABP
chr1	183559601	LOC100288079
chr1	183970305	HMCN1
chr1	184532027	PRG4
chr1	184547408	TPR
chr1	184611512	C1orf27
chr1	184636326	OCLM
chr1	184679320	PDC
chr1	184907566	PTGS2
chr1	185064654	PLA2G4A
chr1	188333419	FAM5C
chr1	188860642	LOC440704
chr1	190394214	RGS18
chr1	190552744	RGS21
chr1	190811479	RGS1
chr1	190871890	RGS13
chr1	191044791	RGS2
chr1	191248118	UCHL5
chr1	191295174	TROVE2
chr1	191332217	GLRX2
chr1	191357710	CDC73
chr1	191372255	MIR1278
chr1	191414482	B3GALT2
chr1	194461535	KCNT2
chr1	194818165	MIR4735
chr1	194887630	CFH
chr1	195010552	CFHR3
chr1	195055483	CFHR1
chr1	195123766	CFHR4
chr1	195179556	CFHR2
chr1	195213289	CFHR5
chr1	195274943	F13B
chr1	195319879	ASPM
chr1	195389436	ZBTB41
chr1	195503956	CRB1
chr1	195740501	DENND1B
chr1	196138304	C1orf53
chr1	196148257	LHX9
chr1	196392730	NEK7
chr1	196758974	ATP6V1G3
chr1	196874759	PTPRC
chr1	197043754	LOC100131234
chr1	197094624	MIR181B1
chr1	197094795	MIR181A1
chr1	198263392	NR5A2
chr1	198449278	FAM58BP
chr1	198578294	C1orf98
chr1	198642042	ZNF281
chr1	198787247	KIF14
chr1	198879787	DDX59
chr1	198975308	CAMSAP2
chr1	199108788	GPR25
chr1	199127249	C1orf106
chr1	199205136	KIF21B
chr1	199275262	CACNA1S
chr1	199370522	TMEM9
chr1	199426575	IGFN1
chr1	199519202	PKP1
chr1	199594764	TNNT2
chr1	199616588	LAD1
chr1	199639517	TNNI1
chr1	199701244	PHLDA3
chr1	199719280	CSRP1
chr1	199755654	RPS10P7
chr1	199884072	NAV1
chr1	200044361	MIR1231
chr1	200064910	IPO9
chr1	200124419	SHISA4
chr1	200132206	LMOD1
chr1	200191241	TIMM17A
chr1	200218388	RNPEP
chr1	200246312	ELF3
chr1	200358651	GPR37L1
chr1	200369154	ARL8A
chr1	200382763	PTPN7
chr1	200403801	PTPRVP
chr1	200429740	LGR6
chr1	200567407	UBE2T
chr1	200584452	PPP1R12B
chr1	200826346	SYT2
chr1	200963154	KDM5B
chr1	201046696	KDM5B-AS1
chr1	201060951	LOC641515
chr1	201097504	LOC148709
chr1	201114032	RABIF
chr1	201126852	KLHL12
chr1	201176582	ADIPOR1
chr1	201197624	CYB5R1
chr1	201222202	LOC401980
chr1	201243156	TMEM183A
chr1	201243158	TMEM183B
chr1	201286933	PPFIA4
chr1	201318879	MYOG
chr1	201363458	ADORA1
chr1	201403561	MYBPH
chr1	201414681	CHI3L1
chr1	201451829	CHIT1
chr1	201534508	LOC730227
chr1	201541286	BTG2
chr1	201576374	FMOD
chr1	201711505	PRELP
chr1	201729893	OPTC
chr1	201862537	ATP2B4
chr1	201965331	SNORA77
chr1	201966327	LINC00260
chr1	202000906	LAX1
chr1	202031373	ZC3H11A
chr1	202033273	ZBED6
chr1	202097362	SNRPE
chr1	202268197	LINC00303
chr1	202308868	SOX13
chr1	202366812	ETNK2
chr1	202390566	REN
chr1	202426091	KISS1
chr1	202433910	GOLT1A
chr1	202454603	PLEKHA6
chr1	202604180	LOC127841
chr1	202639114	PPP1R15B
chr1	202658380	PIK3C2B
chr1	202752129	MDM4
chr1	202852925	LRRN2
chr1	203064404	NFASC
chr1	203278962	CNTN2
chr1	203318879	TMEM81
chr1	203321892	RBBP5
chr1	203378253	DSTYK
chr1	203463660	TMCC2
chr1	203537813	NUAK2
chr1	203572270	KLHDC8A
chr1	203609002	LOC284576
chr1	203617129	LEMD1
chr1	203684052	MIR135B
chr1	203740306	CDK18
chr1	203790023	LOC284578
chr1	203804734	MFSD4
chr1	203843693	ELK4
chr1	203893603	SLC45A3
chr1	203948569	NUCKS1
chr1	204003736	RAB7L1
chr1	204024843	SLC41A1
chr1	204063772	PM20D1
chr1	204097829	LOC284581
chr1	204148799	SLC26A9
chr1	204305533	FAM72A
chr1	204390905	AVPR1B
chr1	204405494	C1orf186
chr1	204484081	CTSE
chr1	204582822	SRGAP2
chr1	204710208	IKBKE
chr1	204747501	RASSF5
chr1	204831597	EIF2D
chr1	204875503	DYRK3
chr1	204924987	MAPKAPK2
chr1	205007570	IL10
chr1	205038837	IL19
chr1	205105776	IL20
chr1	205137410	IL24
chr1	205143252	FAIM3
chr1	205168489	PIGR
chr1	205197934	FCAMR
chr1	205258488	C1orf116
chr1	205283816	YOD1
chr1	205293242	PFKFB2
chr1	205328834	C4BPB
chr1	205344229	C4BPA
chr1	205561439	CD55
chr1	205694267	CR2
chr1	205736095	CR1
chr1	205885080	CR1L
chr1	205992005	CD46
chr1	206041819	MIR29C
chr1	206042410	MIR29B2
chr1	206058346	LOC148696
chr1	206126505	CD34
chr1	206262210	PLXNA2
chr1	207668790	MIR205HG
chr1	207672100	MIR205
chr1	207823667	CAMK1G
chr1	207854840	LAMB3
chr1	207863411	MIR4260
chr1	207915292	G0S2
chr1	207926147	HSD11B1
chr1	207996016	TRAF3IP3
chr1	208022284	C1orf74
chr1	208025590	IRF6
chr1	208067934	DIEXF
chr1	208178141	SYT14
chr1	208471426	C1orf133
chr1	208472817	SERTAD4
chr1	208568218	HHAT
chr1	208918279	KCNH1
chr1	209499330	RCOR3
chr1	209566579	TRAF5
chr1	209622719	LINC00467
chr1	209716486	RD3
chr1	209815003	SLC30A1
chr1	209898221	NEK2
chr1	209983421	LPGAT1
chr1	210180363	INTS7
chr1	210275541	DTL
chr1	210317577	MIR3122
chr1	210525501	PPP2R5A
chr1	210592782	SNORA16B
chr1	210604438	TMEM206
chr1	210672851	NENF
chr1	210805298	ATF3
chr1	210864411	FAM71A
chr1	210926381	BATF3
chr1	210966117	NSL1
chr1	211031792	TATDN3
chr1	211070107	C1orf227
chr1	211096568	FLVCR1-AS1
chr1	211098219	FLVCR1
chr1	211190509	VASH2
chr1	211232146	ANGEL2
chr1	211291210	RPS6KC1
chr1	212057717	PROX1-AS1
chr1	212164714	LINC00538
chr1	212228482	PROX1
chr1	212521187	SMYD2
chr1	212588661	PTPN14
chr1	212843154	CENPF
chr1	213146071	MIR548F3
chr1	213245507	KCNK2
chr1	213807357	KCTD3
chr1	213862858	USH2A
chr1	214743210	ESRRG
